1 **Instability of aquaglyceroporin (AQP) 2 contributes to drug**  
2 **resistance in *Trypanosoma brucei***

3

4 Juan F. Quintana<sup>1</sup>, Juan Bueren-Calabuig<sup>1</sup>, Fabio Zuccotto<sup>1</sup>, Harry P. de Koning<sup>2</sup>,  
5 David Horn<sup>1</sup>, and Mark C. Field<sup>1,3\*</sup>

6

7 <sup>1</sup>School of Life Sciences, University of Dundee, Dow Street, Dundee DD1 5EH, UK.

8 <sup>2</sup>Institute of Infection, Immunity, and Inflammation, University of Glasgow, Glasgow,

9 UK. <sup>3</sup>Biology Centre, Institute of Parasitology, Biology Centre, Czech Academy of  
10 Sciences, Ceske Budejovice, Czech Republic.

11

12 **Present address:** JFQ, Wellcome Centre for Integrative Parasitology, College of  
13 Medical, Veterinary and Life Sciences, Glasgow Biomedical Research Centre,  
14 University of Glasgow, Glasgow, UK.

15

16 **\*Corresponding author:** mfield@mac.com

17

18 **Running head:** Aquaporin trafficking in trypanosomes

19

20 **Keywords:** *Trypanosoma brucei*, aquaglyceroporin, ubiquitylation, protein stability,  
21 pentamidine, drug resistance.

22

23

24

25

26

27

28

29

30

31

32

33

## 34 **Abstract**

35 Defining mode of action is vital for both developing new drugs and predicting  
36 potential resistance mechanisms. African trypanosome pentamidine and  
37 melarsoprol sensitivity is predominantly mediated by aquaglyceroporin 2 (TbAQP2), a  
38 channel associated with water/glycerol transport. TbAQP2 is expressed at the flagellar  
39 pocket membrane and chimerisation with TbAQP3 renders parasites resistant to both  
40 drugs. Two models for how TbAQP2 mediates pentamidine sensitivity have emerged;  
41 that TbAQP2 mediates pentamidine translocation or via binding to TbAQP2, with  
42 subsequent endocytosis, but trafficking and regulation of TbAQPs is uncharacterised.  
43 We demonstrate that TbAQP2 is organised as a high order complex, is ubiquitylated  
44 and transported to the lysosome. Unexpectedly, mutation of potential ubiquitin  
45 conjugation sites, i.e. cytoplasmic lysine residues, reduced folding and tetramerization  
46 efficiency and triggered ER retention. Moreover, TbAQP2/TbAQP3 chimerisation also  
47 leads to impaired oligomerisation, mislocalisation, and increased turnover. These data  
48 suggest that TbAQP2 stability is highly sensitive to mutation and contributes towards  
49 emergence of drug resistance.

50

## 51 Introduction

52 Human African trypanosomiasis (HAT) is a neglected tropical disease affecting  
53 sub-Saharan countries [1–4]. HAT progresses by two stages: a haemolympathic  
54 stage, in which the parasite successfully colonises the bloodstream, lymphatics, skin,  
55 adipose tissue and organs and a meningoencephalic stage characterised by the  
56 emergence of parasites in the central nervous system (CNS) [2,5]. Several drugs are  
57 used to treat HAT; currently suramin and pentamidine are the drugs of choice for  
58 treatment of the haemolympathic stage of *T. brucei rhodesiense* and *T. brucei*  
59 *gambiense* infections respectively, whereas melarsoprol, eflornithine or combined  
60 nifurtimox-eflornithine (NECT) therapy are recommended for the meningoencephalic  
61 stage [6,7].

62 Two new drugs, fexinidazole and acoziborole, recently completed clinical trials  
63 and opened a new front in HAT chemotherapy [8,9]. Drug development, successful  
64 public health initiatives and active case-monitoring programs have all contributed to  
65 the anticipated eradication of *gambiense* HAT as a major public health problem in the  
66 coming decade [10]. However, vigilance and understanding of drug mechanisms and  
67 possible resistance pathways remain essential to maintain this situation, and  
68 *rhodesiense* HAT cannot be eliminated in this way as it is highly zoonotic [11].  
69 Genome-wide RNAi screens identified a number of genes associated with  
70 pentamidine sensitivity that, together with evidence from melarsoprol-pentamidine  
71 cross-resistance (MPXR), identified aquaglyceroporin 2 as the primary determinant for  
72 drug-uptake [12,13], alongside lesser roles for the TbAT1/P2 aminopurine transporter  
73 and the Low Affinity Pentamidine transporter LAPT1 [14].

74 Aquaglyceroporins (AQPs) are an ancient family of multi-pass membrane  
75 proteins, containing both aquaporins that exclusively transport water and  
76 aquaglyceroporins that transport both water and uncharged low molecular weight  
77 solutes [15–17]. The *T. brucei* genome encodes three AQPs (TbAQP1-3) [18], all of  
78 which are nonessential but do control osmoregulation and glycerol transport [13,19–  
79 24]. TbAQP1 (Tb927.6.1520) and TbAQP2 (Tb927.10.14170) are typically localised  
80 to the flagellum and flagellar pocket respectively, whereas TbAQP3 (Tb927.10.14160)  
81 is associated with bulk plasma membrane [13,21,23]. TbAQP2 and TbAQP3 are the  
82 product of a recent gene duplication within the African trypanosome lineage  
83 [13,21,23,25].

84 A selectivity filter restricts the size and properties of solutes that can effectively  
85 pass through the AQP pore [15–17]. In TbAQP1 and TbAQP3, this is formed by two  
86 constrictions of the channel: the canonical “NPA” within two half alpha helices and a  
87 narrower “aromatic/Arginine” (ar/R) motif (Fig. 1A) [13,25,26]. Significantly, TbAQP2  
88 does not retain the canonical configuration but displays an unconventional “NPS/NSA”  
89 cation filter motif. Similarly, the ar/R motif is replaced by a neutral leucine at position  
90 264 (L264), followed by aliphatic rather than aromatic residues (A88, I110, V249 and  
91 L258), which are equivalent to the “IVLL” motif observed in the selectivity pore of other  
92 AQPs [13,23]. These substitutions may permit TbAQP2 to transport larger solutes,  
93 including pentamidine (340 Da) [23]. However, pentamidine also binds TbAQP2 with  
94 nanomolar affinity and replacement of the Leucine 264 by arginine abolishes binding,  
95 leading to resistance [22], consistent with a proposed hypothesis that pentamidine  
96 sensitivity might be mediated by high affinity binding of pentamidine to TbAQP2 and  
97 internalisation *via* endocytosis [22]. It is also plausible that pentamidine exploits both  
98 channel activity and endocytosis of TbAQP2 to gain entry to the trypanosome  
99 cytoplasm.

100 Melarsoprol-pentamidine cross-resistant strains and field isolates from relapse  
101 patients all possess mutations at the locus encoding TbAQP2, including deletions,  
102 single nucleotide polymorphisms and chimerisation [27–30]. Pentamidine-resistant  
103 trypanosomes from a cohort of relapse patients from the Democratic Republic of  
104 Congo also have TbAQP2 chimerisation with the coding sequence for the C-terminal  
105 *trans*-membrane domain replaced by TbAQP3 and in most cases without altering the  
106 selectivity filter characteristic of TbAQP2 (NSA/NPS – IVLL motifs) [29,31,32]. These  
107 observations indicate that, in addition to the sequence at the selectivity pore, other  
108 features are likely to impact drug uptake and transport in *T. brucei* [33].  
109 Here, we set out to investigate TbAQP2 trafficking and to understand the basis of drug  
110 resistance in chimeras where the selectivity filter remains intact. We find that AQPs  
111 form a tetramer of tetramers (4x4) quaternary structure which correlates with high  
112 stability, flagellar pocket localisation and functionality. Furthermore, we demonstrate  
113 that TbAQP2 is ubiquitylated and highly sensitive to mutation of cytoplasmically  
114 oriented lysine residues. Finally, we find that chimerisation of TbAQP2, as observed  
115 in DRC patients, leads to protein instability and mislocalisation, thus explaining the  
116 basis for drug resistance in clinical isolates of *T. brucei*.

## 117 **Materials and methods**

### 118 ***Cell culture and drug sensitivity***

119 Bloodstream form (BSF) *T. brucei* 2T1 and all derivatives were cultured in HMI-  
120 11 (supplemented with 10% heat-inactivated fetal bovine serum (FBS), 100 U/ml  
121 penicillin, 100 U/ml streptomycin and 2 mM L-glutamine) at 37°C with 5% CO<sub>2</sub> in a  
122 humid atmosphere in non-adherent culture flasks with vented caps at densities  
123 between 1 x 10<sup>5</sup> and 1.5 x 10<sup>6</sup> cells/ml. 2T1 cells were maintained in the presence of  
124 phleomycin (1 µg/ml) and puromycin (1 µg/ml). Following transformation, cells were  
125 selected and maintained with hygromycin (2.5 µg/ml) or phleomycin (1 µg/ml) as  
126 appropriate. EC<sub>50</sub> determinations were performed using AlamarBlue® (resazurin  
127 sodium salt) as described [34,35], with 5 mM glycerol added as appropriate; drug  
128 exposure was for 66 hours and AlamarBlue® incubation overnight. Plates were read  
129 on an Infinite 200Pro plate-reader (Tecan) with the following parameters: excitation,  
130 530nm; emission 585 nm; filter cut-off, 570 nm. Proliferation was monitored by dilution  
131 to 1 x 10<sup>5</sup> cells/ml and counting daily. For transfections, 3 x 10<sup>7</sup> bloodstream form cells  
132 were harvested by centrifugation and transfected with 5-10 µg of linearized plasmid  
133 DNA using an Amaxa Nucleofector II (Lonza) with program X-001. Bafilomycin A1,  
134 MG132, Salicylhydroxamic acid (SHAM), glycerol, AlamarBlue®, pentamidine and  
135 ammonium chloride were all from Sigma.

### 136 ***Recombinant DNA manipulation***

137 To express N- or C-terminal HA-tagged AQP constructs, a tandem of three HA  
138 tags was inserted by PCR using the primers: Tb<sup>3xHA</sup>\_AQP2\_Fwd (HindIII):  
139 CCCAAGCTTGGGATGTACCCATACGATGTTCCAGATTACGCTTACCCATACGAT  
140 GTTCCAGATTACGCTTACCCATACGATGTTCCAGATTACGCTCAGAGCCAACCA  
141 GACAATGTG and Tb<sup>3xHA</sup>\_AQP2\_Rev (BamHI):  
142 CGCGGATCCGCGTTAGTGTGGAAGAAAATATTTGTAC. The PCR products were  
143 inserted into pRPa<sup>TAG</sup> [12] after digestion with BamHI/HindIII. All constructs were  
144 verified by sequencing (MRC-PPU DNA Sequencing facility, University of Dundee).  
145 Prior to introduction into trypanosomes pRPa<sup>TAG</sup> constructs were linearized with Ascl  
146 and purified/sterilized by phenol:chloroform extraction. TbAQP2, with all lysine  
147 residues predicted facing the cytoplasm mutated (TbAQP2<sup>5K>R</sup>) was designed and  
148 synthesized by GenScript and verified by sequencing. Point mutations rescuing  
149 individual lysine residues were introduced using the Q5 Site-Directed Mutagenesis Kit

150 (NEB) and confirmed by sequencing. Tagging of lysine mutants was conducted as  
151 above.

## 152 ***Imaging***

153       Antibodies were used at the following dilutions: rat anti-HA IgG<sub>1</sub> (clone 3F10;  
154 Sigma) at 1:1000, rabbit anti-ISG75 (in house) at 1:500, mouse anti-p67 (from J.  
155 Bangs) at 1:500. Secondary antibodies (Thermo) were at: anti-rat Alexa-568 at  
156 1:1,000, anti-rabbit Alexa-488 at 1: 1,000, anti-mouse Alexa-488 at 1: 1,000.  
157 Coverslips were mounted using Vectashield mounting medium supplemented with 1  
158 ug/ml 4,6-diamidino-2-phenylindole (DAPI; Vector Laboratories, Inc.). Slides were  
159 examined on a Zeiss Axiovert 200 microscope with an AxioCam camera and ZEN Pro  
160 software (Carl Zeiss, Germany). For co-localization cells were analysed by confocal  
161 microscopy with a Leica TCS SP8 confocal laser scanning microscope and the Leica  
162 Application Suite X (LASX) software (Leica, Germany). Images were acquired as z-  
163 stacks (0.25 µm). Digital images were processed using the Omero Open microscopy  
164 environment (University of Dundee; <https://www.openmicroscopy.org/omero/>). In all  
165 cases, images for a specific analysis were acquired with identical settings.

## 166 ***Protein turnover***

167       To determine protein half-life, translation was blocked by addition of  
168 cycloheximide (100 µg/ml) and cells were harvested at various times by centrifugation  
169 (800 g for 10 min at 4°C). Cells were washed with ice-cold PBS, then resuspended in  
170 1x SDS sample buffer (Thermo) and incubated at 70°C for 10 min. Samples were  
171 subjected to standard SDS-PAGE electrophoresis.

## 172 ***Western blotting***

173       Proteins were separated by electrophoresis on a 4-12% precast acrylamide  
174 Bis-Tris gel (Thermo) and transferred to PVDF membranes using the iBlot2 system  
175 (23 V, 6 min; Thermo). Non-specific binding was blocked using 5% (w/v) bovine serum  
176 albumin (BSA; Sigma) in Tris-buffered saline (pH 7.4) with 0.2% (v/v) Tween-20  
177 (TBST). Membranes were incubated with primary antibodies diluted in TBST  
178 supplemented with 1% BSA overnight at 4°C. Antibodies were used at the following  
179 dilutions: rat anti-HA epitope IgG<sub>1</sub> (clone 3F10; Sigma) at 1:5,000, rabbit anti-ISG75  
180 (in house) at 1: 10,000, anti-mouse b-tubulin (clone KMX-1; Millipore) at 1: 10,000.  
181 Following five washes with TBST of 10 min each, membranes were incubated with  
182 secondary antibodies diluted in TBST supplemented with 1% BSA. Dilutions of

183 horseradish peroxidase (HRP)-coupled secondary antibodies (Sigma) were anti-rat-  
184 HRP at 1: 10,000, anti-rabbit-HRP at 1: 10,000, anti-mouse-HRP at 1: 10,000.  
185 Detection was carried out by incubating membranes with ECL Prime Western Blotting  
186 System (Sigma) and GE healthcare Amersham Hyperfilm ECL (GE). Densitometry  
187 quantification was conducted using ImageJ software (NIH). For quantification using  
188 the Li-COR system (Li-Cor Bioscience, Lincoln NE), the following antibodies were  
189 diluted in Odyssey blocking buffer (Li-COR): goat anti-rabbit IgG: IR Dye680RD and  
190 goat anti-mouse or anti-rat IgG: IRDye800CW (Li-COR). All washes were with PBS  
191 supplemented with 0.5% Tween20. Quantitative Fluorescence signals were quantified  
192 on an Odyssey CLx Imager and processed using Li-COR software (Li-COR).

### 193 ***Blue native PAGE (BN-PAGE)***

194 BN-PAGE was performed using the NativePAGE Bis-Tris gel system (Thermo).  
195 Briefly, cells were washed three times with 1X PBS supplemented with protease  
196 inhibitor cocktail without EDTA (Roche) and solubilized in Native PAGE sample buffer  
197 supplemented with 10% glycerol, 1% n-dodecyl-b-d-maltoside, 1x protease inhibitor  
198 cocktail without EDTA (Roche), 100  $\mu\text{g/ml}$  micrococcal nuclease (NEB), and 1x  
199 micrococcal nuclease buffer (NEB). Samples were incubated in solubilization buffer  
200 on ice for 30 min and centrifuged (13,000 g at 4 °C, 30 min). The resulting supernatants  
201 were fractionated on precast 4-16% BN gradient gels (Thermo).

### 202 ***Affinity isolation***

203 Ubiquitylated proteins were isolated using the UbiQapture-Q kit (Enzo Life  
204 Sciences, Farmingdale, New York, USA) according to the manufacturer's instructions.  
205 Ubiquitylated proteins were isolated from a total of  $1 \times 10^7$  cells lysed with TEN buffer  
206 (150 mM NaCl, 50 mM Tris-HCl, pH 7.4, 5 mM EDTA, 1% Triton X-100), supplemented  
207 with 100 mM N-ethylmaleimide (NEM) to inhibit deubiquitinase activity [36]. A total of  
208 40  $\mu\text{l}$  of UbiQapture-Q<sup>TM</sup> matrix was pre-equilibrated in TEN buffer and incubated with  
209 cell lysates (200  $\mu\text{l}$ ) by rotating at 4°C overnight. After washing five times, captured  
210 proteins were eluted with 2x SDS-PAGE sample buffer containing 10mM DTT.  
211 Samples were resolved in 4-12% acrylamide gels, transferred onto PVDF membranes  
212 and analyzed by Western blotting using anti-HA antibody in blocking buffer (TBST  
213 supplemented with 1% BSA).

### 214 ***Molecular modelling***

215 A homology model of TbAQP2 tetramer (residues 68-312) was built using Modeller  
216 (version 9.20) [37,38] using as template the crystal structure of the *Homo sapiens*  
217 AQP10 (PDB code 6f7H) [39]. The N-terminus (residues 1-59) could not be modelled  
218 due to predicted flexibility and low sequence similarity. *T. brucei* AQP2 has 33%  
219 identity compared to *Homo sapiens* AQP10. Multiple sequence alignments were  
220 performed using T-Coffee [40] and ClustalW [41]. The geometries of the homology  
221 model were refined using Maestro and verified using PROCHECK [42] The resulting  
222 Ramachandran plots indicated a good model quality with 93% of the residues in most  
223 favoured regions. A second model displaying K147R and K234R mutations in each  
224 monomer was generated following the same protocol. Both models were refined using  
225 all-atom molecular dynamics (MD) simulations with Desmond [43]. Each system was  
226 embedded as a tetramer in a periodic POPC lipid bilayer generated with “System  
227 Builder” in Maestro and solvated in aqueous 150mM KCl. The OPLS3e force field was  
228 used to further improve the resulting molecular model [44]. The cut-off distance for  
229 non-bonded interactions was 9 Å. The SHAKE algorithm was applied to all bonds  
230 involving hydrogens, and an integration step of 2.0 fs was used throughout [45]. The  
231 systems were simulated with no restraints at constant temperature (300K) and  
232 pressure (1atm) for 100ns. Protein structures and MD trajectories were visually  
233 inspected and analysed using the molecular visualization programs PyMOL, VMD [45]  
234 and Maestro [43].

## 235 **Results**

### 236 ***TbAQP2 forms stable tetrameric complexes in the bloodstream form of T. brucei***

237 TbAQP2 (Tb927.10.14170) is critical for water and glycerol transport activity as  
238 well as sensitivity to diamidines and melaminophenyl arsenicals in African  
239 trypanosomes [13,23,33]. A recent study suggested that pentamidine may be a  
240 nanomolar ligand, rather than a transport substrate of TbAQP2 [22] and that  
241 endocytosis of TbAQP2 might be important for pentamidine transport. However, the  
242 intracellular and surface trafficking pathways of AQPs in trypanosomes have not been  
243 elucidated. Central to endocytosis and protein sorting of many surface membrane  
244 proteins is ubiquitylation [46], and ubiquitylation of the type I surface-localised invariant  
245 surface glycoproteins 65 and 75 (ISG65 and ISG75) is essential for internalization and  
246 degradation in the lysosome [33,47,48].



247 To determine whether ubiquitylation is involved in trafficking and turnover of  
248 polytopic surface proteins in trypanosomes we addressed whether TbAQP2 is  
249 ubiquitylated *in vivo*. We generated *T. brucei* cell lines expressing TbAQP2 tagged at  
250 the N- ( $3^{\times}\text{HA}$ AQP2) or C-terminus (AQP2 $3^{\times}\text{HA}$ ) (**Fig 1A and B**) using an *aqp*-null cell line  
251 [19] as chassis to prevent heterologous interaction with endogenous AQPs. The  
252 hemagglutinin (HA) tag was selected as it lacks lysine residues (as opposed to more  
253 bulky tags such as GFP) and therefore is incapable of becoming ubiquitylated and  
254 interfering with data interpretation. Both constructs co-localized with ISG75 at the  
255 posterior end of the cell, consistent with the location of native AQP2 at the flagellar  
256 pocket (**Fig 2A**).  $3^{\times}\text{HA}$ AQP2 is predominantly detected as two forms by immunoblotting  
257 after SDS-PAGE: a ~38 kDa form, consistent with the monomeric form, and a >120  
258 kDa form, likely a homotetramer (**Fig 2B, lower panel**), as previously reported for  
259 other AQPs [16,49–51]. In sharp contrast, AQP2 $3^{\times}\text{HA}$  was found as two main species  
260 of ~35 kDa and ~38 kDa, with no tetrameric form detected (**Fig 2B, lower panel**).  
261 However, under native conditions, both constructs are organized as high molecular  
262 weight complexes of ~480 kDa, consistent with a 4x4 conformation under native  
263 conditions (**Fig 2B, upper panel**).

264 Thus, whereas  $3^{\times}\text{HA}$ AQP2 is readily detectable as a stable tetramer, even under  
265 harsh conditions, AQP2 $3^{\times}\text{HA}$  is comparatively less stable in its tetrameric form (**Fig 2B**),  
266 likely indicating interference by the C-terminal HA tag to oligomerization and/or  
267 tetramer stability. To determine the glycerol transport capacity of these proteins, we  
268 inhibited the activity of the trypanosome alternative oxidase (TAO) with  
269 salicylhydroxamic acid (SHAM) [21]. Inhibition of TAO leads to increased intracellular  
270 glycerol, building up to toxic levels that can only be prevented by export *via* a glycerol  
271 transporter such as AQP. Therefore, the absence of functional AQPs renders cells  
272 highly susceptible to SHAM. Consistent with stability of the AQP2 $3^{\times}\text{HA}$  oligomeric form,  
273 expression of the  $3^{\times}\text{HA}$ AQP2 construct in the *aqp*-null background restored sensitivity  
274 to pentamidine and glycerol transport comparable to wild type cells, whereas  
275 AQP2 $3^{\times}\text{HA}$  only partly rescued these phenotypes (**Fig 2C and S1 Fig**). Both  $3^{\times}\text{HA}$ AQP2  
276 and AQP2 $3^{\times}\text{HA}$  have long half-lives (>4h) (**Fig 2D**) indicating that impaired transport  
277 activity of AQP2 $3^{\times}\text{HA}$  is unlikely due to altered turnover or structure. Therefore, although  
278 introduction of HA epitopes to either terminus does not alter localization, only the N-  
279 terminal tagged form assembles stable oligomeric structures and fully functional  
280 TbAQP2. Therefore, we selected to focus on  $3^{\times}\text{HA}$ AQP2.

281 ***TbAQP2 is ubiquitylated and degraded by the lysosome***

282 Next, we sought evidence that TbAQP2 is ubiquitylated. Cycles of protein  
283 ubiquitylation and deubiquitylation are important for controlling the cell surface  
284 composition of trypanosomes [25,33,52]. Both proteasome-dependent and lysosome-  
285 mediated protein degradation are generally initiated by covalent attachment of one or  
286 more ubiquitin moieties to a substrate protein [53], and we rationalized that inhibiting  
287 these degradative systems would increase the overall abundance of ubiquitylated  
288 intermediates.

289 We observed high molecular weight adducts when cells expressing <sup>3xHA</sup>AQP2  
290 were treated with either ammonium chloride (lysosomal activity inhibitor) or MG132  
291 (proteasome inhibitor) (**Fig 3A**), likely representing ubiquitylated intermediates *en*  
292 *route* to degradation. Subsequent western blotting identified a predominant band of  
293 ~55 kDa reactive to anti-ubiquitin antibody upon immunoprecipitation with anti-HA  
294 magnetic beads, consistent with the addition of ubiquitin to TbAQP2 (~38 kDa for  
295 unmodified protein (**Fig 3B**). To corroborate these results, we performed an affinity  
296 isolation using a commercial ubiquitin binding domain (UBD) resin followed by western  
297 blotting with anti-HA antibody. This revealed unmodified monomer together with high  
298 molecular weight adducts, likely representing TbAQP2 with various numbers of  
299 ubiquitin conjugates; the latter clearly represents a small fraction of total AQP2  
300 expressed in these cells (**Fig 3C**). Interestingly, we noted a band of around ~40 kDa,  
301 likely corresponding to monoubiquitylated TbAQP2 (**Fig 3C**). Collectively, these  
302 results indicate that TbAQP2 is modified by ubiquitin in the bloodstream form of *T.*  
303 *brucei*.

304 Next, we sought to investigate the mechanisms by which TbAQP2 is degraded.  
305 Imaging suggested that TbAQP2 is predominantly located at the flagellar pocket  
306 together with ISG75, but a proportion is also in close proximity to early endosomes  
307 (positive for Rab5A and Rab5B) but less so for recycling endosomes (Rab11) (**Fig 4A**)  
308 suggesting transit of TbAQP2 through early endosomes. Moreover, TbAQP2  
309 displayed strong overlap with p67, a lysosomal marker, suggesting that TbAQP2 is  
310 delivered to the lysosome *via* endocytosis (**Fig 4A**). Similar observations were made  
311 with cells expressing AQP2<sup>3xHA</sup> (**S2 fig**), once more indicating that the C-terminal tag  
312 does not impair trafficking but rather hinders oligomerisation. Further, pulse-chase  
313 analysis showed that ISG75 has a half-life of ~3.6 h, consistent with earlier studies  
314 [33,47,48], whereas TbAQP2 displays bimodal behaviour with approximately half

315 rapidly turned over in <1 h, with the remaining fraction is more stable, with a half-life  
316 of ~6 h (**Fig 4B**), which together with partial juxtaposition with Rab11, suggests  
317 possible recycling. To determine whether TbAQP2 is degraded in the lysosome or the  
318 proteasome we treated cells with bafilomycin A1 (BafA1; inhibitor of the lysosomal v-  
319 ATPase) or MG132 (canonical proteasome inhibitor with broad-range inhibitory  
320 capacity against serine proteases and calpain-like proteases [54]). In untreated cells,  
321 TbAQP2 was reduced by ~50% after 1 h as expected, but in cells treated with BafA1  
322 or MG132, less than 20% of the protein was degraded (**Fig 4C**). It is important to note  
323 that MG132 can also impair degradation of proteins delivered to the lysosome as it  
324 acts as a broad range inhibitor for lysosome-specific proteases [54]. Overall, these  
325 data indicate that TbAQP2 is ubiquitylated and delivered to the lysosome for  
326 degradation, *albeit* with a pool of longer-lived protein that may constitute a recycling  
327 population.

### 328 ***Intracellular N-terminal lysine residues are essential for oligomerisation and*** 329 ***channel function of TbAQP2***

330 Predictions of TbAQP2 topology [55] suggested cytosolic localisations for both  
331 N- and C-termini, as is known for the mammalian orthologues (**S3 Fig**, [15,56]). AQP2  
332 has five lysine residues that are exposed to the cytosol, at positions 19, 45, 54, 147,  
333 and 234 (**Fig 1B**). To better understand the potential ubiquitylation sites in TbAQP2,  
334 we used UbPred (<http://www.ubpred.org>) [57] to predict lysine residues as candidate  
335 ubiquitin acceptors. UbPred suggested that lysine residues in position 19, 45, and 54  
336 are potential ubiquitylation sites in TbAQP2, with prediction scores of 0.65, 0.73, and  
337 0.88, respectively. All three residues are located within the N-terminal cytoplasmic  
338 region of AQP2 (**Fig 1B**).

339 To dissect the contribution of these residues to TbAQP2 localisation and  
340 function, we generated a cell line expressing N-terminally tagged AQP2 in which all  
341 three of these lysine residues were simultaneously mutated (AQP2<sup>3K>R</sup>).  
342 Unexpectedly, while the wild-type protein located in the posterior end of the cell,  
343 AQP2<sup>3K>R</sup> was mislocalized (**Fig 5A**) and failed to restore pentamidine sensitivity and  
344 glycerol transport (**Fig 5B**). Furthermore, whereas AQP2<sup>WT</sup> co-localises with ISG75 at  
345 the posterior end of the cells, AQP2<sup>3K>R</sup> was retained in the endoplasmic reticulum  
346 (ER), as suggested by co-localisation with the ER marker TbBiP (**Fig 5C**). Blue native-  
347 PAGE indicated that whereas AQP2<sup>WT</sup> forms two high molecular weight complexes  
348 (~480 kDa and ~120 kDa), AQP2<sup>3K>R</sup> did not oligomerise (**Fig 5D and S4 Fig**).

349 Moreover, AQP2<sup>3K>R</sup> is highly unstable and turned over faster than AQP2<sup>WT</sup> and in an  
350 MG-132 selective manner (**Fig 5E**). We conclude that K19, K45 and K54 are essential  
351 for TbAQP2 folding and hence anterograde trafficking and that their replacement by  
352 arginine triggers entry into an ER-associated degradative (ERAD) pathway [58–60].

### 353 ***Site-directed mutation of cytoplasmic lysine residues of TbAQP2 leads to*** 354 ***protein instability***

355 To determine whether the effects observed for AQP2<sup>3K>R</sup> could be attributed to  
356 a single lysine residue we generated a construct in which all cytoplasmic lysine  
357 residues were mutagenized to arginine (AQP2<sup>5K>R</sup>) (**Fig 1B**). Using this construct as  
358 template, we reverted each lysine individually using site-directed mutagenesis,  
359 generating cell lines expressing N-terminally tagged mutant TbAQP2 with only one  
360 lysine residue reinstated (AQP2<sup>R19K</sup>, AQP2<sup>R45K</sup>, and AQP2<sup>R54K</sup>). None of these  
361 mutants formed oligomers (**S4A Fig.**) and were retained in the ER, as demonstrated  
362 by co-localisation with TbBiP (**Fig 6A**). Moreover, AQP2<sup>5K>R</sup>, AQP2<sup>R19K</sup>, AQP2<sup>R45K</sup>,  
363 and AQP2<sup>R54K</sup> turn over faster than AQP2<sup>WT</sup> and are stabilised by MG-132 (**Fig 6B**  
364 **and Table 1**), consistent with the absence of detection by BN-PAGE analysis and the  
365 lack of sensitivity to pentamidine and glycerol transport observed in these mutants  
366 (**Fig 6C**). Similar results were obtained with AQP2<sup>R234K</sup> (**S4F Fig**). K234 is located  
367 within the TM4-TMD5 loop, an important feature of TbAQP2 as this loop is predicted  
368 to interact with the TM4-TM5 loop of the neighbouring subunit to create a large  
369 oligomerization interface (**S4G Fig, left panel**).

370 Molecular dynamics (MD) simulations of TbAQP2<sup>WT</sup> and TbAQP2<sup>K147R/K234R</sup>  
371 suggest that the K234R mutation will likely have a notable effect on the position of the  
372 TM4-TM5 loop, hampering oligomerization (**S4G Fig**). It is important to note that we  
373 failed to successfully express AQP2<sup>R147K</sup> despite multiple independent transfections.  
374 Residue 147 is located between TMD4 and TMD5, potentially indicating that mutation  
375 of this residue leads to a far more unstable protein than the other constructs, and in  
376 good agreement with the MD simulations. In TbAQP2<sup>WT</sup>, K147 is predicted to interact  
377 with Y151 and N70 on TMD1 and maintain the TMD3-TMD1 interface (**S4G Fig, right**  
378 **panel**). On the other hand, simulations of TbAQP2<sup>K147R/K234R</sup> showed a significant  
379 conformational change of TMD1 and TMD3 as a result of establishment of a salt bridge  
380 between R234 and D73 on TMD1. This conformational change on TMD1 would impact  
381 both the conformation of the N-terminal tail and the dimerization interface with TMD6  
382 from the neighbouring subunit, providing a rationale for the instability observed in this

383 mutant. Consistent with a lack of oligomerization and rapid turnover all of these  
384 constructs failed to restore pentamidine sensitivity or glycerol transport (**Fig 6C and**  
385 **Table 1**).

### 386 ***Chimerization of TbAQP2 impairs stability, localization and function***

387 *T. brucei* possesses three AQP paralogues [21,23]. Of these, TbAQP2 and  
388 TbAQP3 are tandem open reading frames located on chromosome 10 and share  
389 >70% protein identity [13]. Chimerisation of the loci encoding TbAQP2 and TbAQP3  
390 causes resistance to pentamidine and melarsoprol [27,29,32,56]. Interestingly,  
391 although in some cases the selectivity pore is mutated, many chimeric AQP2/3 alleles  
392 do not have altered amino acids in the selectivity pore, but rather replacement of TMD  
393 regions with sequences from TbAQP3 (**Fig 1C**), [29–32]. Moreover, the AQP2/3  
394 chimeras characterised so far display a subcellular localisation resembling TbAQP3  
395 at the plasma membrane, in contrast with an expected flagellar pocket localisation for  
396 TbAQP2 (**Fig 2A**) [27]. However, it is unclear if TbAQP2 chimerisation impacts  
397 additional features beyond subcellular localisation.

398 We generated cell lines expressing tetracycline-regulated N-terminal tagged  
399 TbAQP1, TbAQP2, TbAQP3 and the chimeric AQP2/3 40AT (40AT) (**Fig 1C**), isolated  
400 from relapse patients from the Democratic Republic of Congo [29]. One of the main  
401 structural features of this chimera is replacement of the sixth *trans*-membrane and C-  
402 terminus of TbAQP2 with the corresponding sequence of TbAQP3 (**Fig 1C**) [29].  
403 Additionally, to simulate other chimeric AQP2/3 proteins identified in laboratory strains  
404 and field isolates, we generated AQP2 mutants where TMD4 (AQP2<sup>TMD4</sup>) and TMD5  
405 (AQP2<sup>TMD5</sup>) are individually replaced by the corresponding TMDs from TbAQP3 (**Fig**  
406 **1C**). Apart from the AQP2<sup>TMD5</sup> construct, none of these constructs alter the amino acid  
407 composition of the selectivity filter of TbAQP2 (**S5 and S6 Fig**). Whereas we readily  
408 expressed AQP2<sup>TMD4</sup>, we failed to obtain positive clones for AQP2<sup>TMD5</sup>, despite  
409 multiple attempts. We observed that TbAQP2 colocalised with ISG75, as expected, as  
410 well as TbAQP1 which seems to localise in close proximity to ISG75, whereas  
411 TbAQP3 localises mainly to the cell surface as previously reported [13,21] (**Fig 7A,**  
412 **left-hand panel**). Conversely, AQP2<sup>TMD4</sup> and the clinical chimera 40AT displayed a  
413 distinct localisation in proximity with TbBiP (**Fig 8A**). Western blotting showed that  
414 under reducing conditions, all these constructs are readily detected as monomers of  
415 ~35-38 kDa (**Fig 7A, right-hand panel**). Under native conditions, both TbAQP1 and  
416 TbAQP2 can be readily detected as *n*-dodecyl b-D-maltoside (DDM)-soluble forms of

417 ~480 kDa species, consistent with the proposed 4x4 organization, whereas we failed  
418 to observe such complexes for TbAQP3, 40AT, and AQP2<sup>TMD4</sup> (**Fig 7B**). TbAQP3,  
419 AQP2<sup>TMD4</sup> and 40AT are turned over more rapidly (<1 h) than TbAQP1 and TbAQP2  
420 (**Fig 7D and Table 2**), explaining the lack of glycerol transport in cells expressing these  
421 constructs (**Fig 7C**).

422 The localisation of TbAQP3 and the chimeric AQP2-3 proteins is reminiscent of  
423 the subcellular localization observed in the lysine-to-arginine TbAQP2 mutants. Based  
424 on these observations we hypothesised that these constructs are likely to be retained  
425 in the ER, at least to a level comparable to that of the lysine-to-arginine TbAQP2  
426 mutants. We observed that whereas TbAQP1 and TbAQP2 show poor co-localisation  
427 with TbBiP, the signal of TbAQP3 and 40AT partly co-localised with this ER marker,  
428 indicating some degree of retention within this organelle (**Fig 8A**). Moreover, TbAQP3  
429 and 40AT turnover was faster than TbAQP1 and TbAQP2 and was significantly  
430 impaired in the presence MG132 but not bafilomycin A1(**Fig 8B**), indicating that these  
431 constructs are retained and degraded in the ER and not in the lysosome, as observed  
432 for TbAQP2.

433

## 434 Discussion

435 Aquaporins are present throughout prokaryotes and eukaryotes [15–17], and  
436 have conserved topology and quaternary structure. AQPs form homotetrameric  
437 complexes to transport water and low molecular weight solutes [15–17]. Independent  
438 expansions of AQP paralogues have served to diversify function and in mammals and  
439 *Leishmania major* both ubiquitylation and phosphorylation are important in modulating  
440 turnover and hence activity [61–66]. Significantly, the three trypanosome AQP  
441 paralogs derive from a single ancestral gene shared with *Leishmania spp.*, and thus  
442 relative functions of paralogs are likely differentially distributed between major  
443 lineages. Despite clear clinical importance, little is known concerning AQP trafficking  
444 and higher order assembly in trypanosomes and specifically the impact of mutations  
445 on these properties. We found that TbAQP2 assembles into high molecular weight  
446 complexes that potentially resemble the quasi-arrays described for HsAQP4 [67–71].  
447 Oligomerization correlates with bidirectional glycerol flow but also pentamidine  
448 sensitivity as C-terminal tagged forms form oligomers with low efficiency and have

449 poor transport activity. Furthermore, TbAQP2 is ubiquitylated and targeted to the  
450 lysosome, similar to mammalian AQPs [62].

451 Pentamidine is thought to be taken up *via* translocation by and/or endocytosis of  
452 TbAQP2 [22,56]. If endocytosis were the sole route and assuming that lysosomal  
453 delivery is required, a faster turnover rate than ~1 h would be necessary to achieve  
454 the intracellular pentamidine levels observed, i.e. ~16 pmol pentamidine/10<sup>7</sup> cells per  
455 hour [72]. Neither pentamidine nor melarsoprol sensitivity requires an obvious  
456 lysosomal transporter, suggesting that channel-mediated transport is required,  
457 regardless of any endocytic contribution. However, the intrinsic instability of several  
458 tagged TbAQP2 mutants precluded detailed dissection of uptake pathways as all of  
459 the lysine to arginine mutations led to ER retention [59,60]. As specific mutation of  
460 selectivity pore residues does not alter localisation to the flagellar pocket, residues  
461 elsewhere are more important for efficient folding.

462 All *T. brucei* AQP paralogs are predicted as topologically similar, but  
463 nevertheless possess distinct properties and subcellular localisations [13,18–23,73].  
464 TbAQP2 is essential for pentamidine and melarsoprol uptake [13], while TbAQP3 is  
465 associated with susceptibility to antimonial compounds including sodium  
466 stibogluconate [71], indicating transport specificity. Trypanosomes from patients  
467 following melarsoprol treatment failure possess a mutated AQP2/3 locus  
468 [20,28,29,56,74], with single nucleotide polymorphisms, AQP2 deletions and several  
469 fusions replacing TbAQP2 TMD4, 5 or 6 with TbAQP3 sequences, in most cases  
470 without impacting the NPA/NPA and WGYR selectivity pore motifs [29,31,32]. Several  
471 chimeras have aberrant subcellular localisations [20,28,29,56,74], indicating that the  
472 selectivity filters is comparatively unimportant for targeting. Consistent with this is that  
473 both TbAQP1 and TbAQP2 assemble into higher order complexes but TbAQP3  
474 apparently does so less efficiently. Similarly, TbAQP1 and TbAQP2 have a long half-  
475 life ( $t_{1/2} >4$  h) and restricted subcellular localisation around the flagellar pocket,  
476 whereas TbAQP3 is comparatively short-lived ( $t_{1/2} \sim 1$  h) and localises mainly to the  
477 cell body surface, suggesting a connection between oligomerisation, stability,  
478 subcellular localisation and transport activity [67,69–71]. Furthermore, replacement of  
479 TMD4 or 6 in TbAQP2 by TbAQP3 sequences (we were unable to generate TMD5  
480 chimeras), as observed in clinically relevant chimeric AQP2-3, led to impaired  
481 oligomerisation, ER-retention and decreased stability, strengthening the correlation  
482 between oligomerisation, localisation and function.

483 In summary, we propose that pentamidine uptake depends upon the structural  
484 organisation of TbAQP2 and that channel activity is essential. Furthermore, TbAQP2  
485 is highly sensitive to mutation and/or chimerisation, which results in failure to correctly  
486 fold and ER-retention. This mechanism most likely accounts for many instances of  
487 clinically observed pentamidine and melarsoprol resistance.

488

## 489 **Acknowledgements**

490 This work was supported by grants from the Wellcome Trust (204697/Z/16/Z to  
491 MCF and 1000320/Z/12/Z to DH) and the Medical Research Council (MR/P009018/1  
492 to MCF). We are grateful to Dave Ng for assistance with sample preparation for  
493 imaging and to Martin Zoltner and Ricardo Canavate del Pino for helpful discussions  
494 during the preparation of this manuscript. We are also grateful to Pascal Mäser (Swiss  
495 Tropical and Public Health Institute) for providing the 40AT chimera.

496

## 497 **References**

- 498 1. Capewell P, Atkins K, Weir W, Jamonneau V, Camara M, Clucas C, et al.  
499 Resolving the apparent transmission paradox of African sleeping sickness. *PLoS*  
500 *Biol.* 2019;17:e3000105.
- 501 2. Brun R, Blum J, Chappuis F, Burri C. Human African trypanosomiasis. *Lancet.*  
502 2010;375:9–15.
- 503 3. Mehlitz D, Molyneux DH. The elimination of *Trypanosoma brucei gambiense*?  
504 Challenges of reservoir hosts and transmission cycles : Expect the unexpected.  
505 *Parasite Epidemiol Control.* 2020;6:e00113.
- 506 4. Selby R, Wamboga C, Erphas O, Mugenyi A, Jamonneau V, Waiswa C, et al.  
507 Gambian human African trypanosomiasis in North West Uganda . Are we on course  
508 for the 2020 target ? *PLoS Negl Trop Dis.* 2019;13:e0007550.
- 509 5. Maclean L, Reiber H, Kennedy PGE, Sternberg JM. Stage Progression and  
510 Neurological Symptoms in *Trypanosoma brucei rhodesiense* Sleeping Sickness :  
511 Role of the CNS Inflammatory Response. *PLoS Negl Trop Dis.* 2012;6:e1857.
- 512 6. Baker N, Koning HP De, Mäser P, Horn D. Drug resistance in African  
513 trypanosomiasis : the melarsoprol and pentamidine story. *Trends Parasitol.* 2013;29.
- 514 7. Field MC, Horn D, Fairlamb AH, Ferguson MAJ, Gray DW, Read KD, et al. Anti-  
515 trypanosomatid drug discovery: An ongoing challenge and a continuing need. *Nat*



- 516 Rev Microbiol. 2017;15:217–31.
- 517 8. Mesu VKBK, Kalonji WM, Bardonneau C, Mordt OV, Blesson S, Simon F, et al.  
518 Oral fexinidazole for late-stage African *Trypanosoma brucei gambiense*  
519 trypanosomiasis: a pivotal multicentre, randomised, non-inferiority trial. *Lancet*.  
520 2017;391:144–54.
- 521 9. Wall RJ, Rico E, Lukac I, Zuccotto F, Elg S, Gilbert IH, et al. Clinical and  
522 veterinary trypanocidal benzoxaboroles target CPSF3. *Proc Natl Acad Sci U S A*.  
523 2018;115:9616–21.
- 524 10. Pandey A, Galvani A. Strategies for *Trypanosoma brucei gambiense* elimination.  
525 *Lancet Glob Heal*. 2017;5:10–1.
- 526 11. Acup C, Bardosh KL, Picozzi K, Waiswa C, Welburn SC. Factors influencing  
527 passive surveillance for *T. b. rhodesiense* human african trypanosomiasis in  
528 Uganda. *Acta Trop*. 2017;165:230–9.
- 529 12. Alsford S, Eckert S, Baker N, Glover L, Sanchez-Flores A, Leung KF, et al. High-  
530 throughput decoding of antitrypanosomal drug efficacy and resistance. *Nature*.  
531 2012;482:232–6.
- 532 13. Baker N, Glover L, Munday JC, Aguinaga Andres D, Barrett MP, de Koning HP,  
533 et al. Aquaglyceroporin 2 controls susceptibility to melarsoprol and pentamidine in  
534 African trypanosomes. *Proc Natl Acad Sci*. 2012;109:10996–1001.
- 535 14. De Koning HP. Uptake of pentamidine in *Trypanosoma brucei brucei* is mediated  
536 by three distinct transporters: implications for cross-resistance with arsenicals. *Mol*  
537 *Pharmacol*. 2001;59:586–92.
- 538 15. Verkman AS. Aquaporins at a glance. *J Cell Sci*. 2011;124:2107–12.
- 539 16. Verkman AS, Anderson MO, Papadopoulos MC. Aquaporins: important but  
540 elusive drug targets. *Nat Rev Drug Discov*. 2014;13:259–77.
- 541 17. Hub JS, de Groot BL. Mechanism of selectivity in aquaporins and  
542 aquaglyceroporins. *Proc Natl Acad Sci*. 2008;105:1198–203.
- 543 18. Berriman M, Ghedin E, Hertz-Fowler C, Blandin G, Renauld H, Bartholomeu DC,  
544 Lennard NJ, Caler E, Hamlin NE, Haas B, Böhme U, Hannick L, Aslett MA, Shallom  
545 J, Marcello L, Hou L, Wickstead B, Alsmark UC, Arrowsmith C, Atkin RJ, Barron AJ,  
546 Bringaud F, Brooks E-SN. The genome of the African trypanosome *Trypanosoma*  
547 *brucei*. *Science (80- )*. 2005;309:416–22.
- 548 19. Beitz E. Aquaporins from pathogenic protozoan parasites: structure, function and  
549 potential for chemotherapy. *Biol Cell*. 2005;97:373–83.

- 550 20. Schmidt RS, Macêdo JP, Steinmann ME, Salgado AG, Bütikofer P, Sigel E, et al.  
551 Transporters of *Trypanosoma brucei*—phylogeny, physiology, pharmacology. *FEBS*  
552 *J.* 2018;285:1012–23.
- 553 21. Jeacock L, Baker N, Wiedemar N, Maser P, Horn D, Maser P, et al.  
554 Aquaglyceroporin-null trypanosomes display glycerol transport defects and  
555 respiratory-inhibitor sensitivity. *PLoS Pathog.* 2017;13:1–16.
- 556 22. Song J, Baker N, Rothert M, Henke B, Jeacock L, Horn D, et al. Pentamidine Is  
557 Not a Permeant but a Nanomolar Inhibitor of the *Trypanosoma brucei*  
558 Aquaglyceroporin-2. *PLoS Pathog.* 2016;12:1–14.
- 559 23. Bassarak B, Uzcátegui NL, Schönfeld C, Duszenko M. Functional  
560 Characterization of Three Aquaglyceroporins from *Trypanosoma brucei* in  
561 Osmoregulation and Glycerol Transport. *Cell Physiol Biochem.* 2011;27:411–20.
- 562 24. Uzcategui NL, Szallies A, Pavlovic-Djuranovic S, Palmada M, Figarella K,  
563 Boehmer C, et al. Cloning, heterologous expression, and characterization of three  
564 aquaglyceroporins from *Trypanosoma brucei*. *J Biol Chem.* 2004;279:42669–76.
- 565 25. Quintana JF, Del Pino RC, Yamada K, Zhang N, Field MC. Adaptation and  
566 therapeutic exploitation of the plasma membrane of African trypanosomes. *Genes.*  
567 2018;9.
- 568 26. Sui H, Han B, Lee J, Walian P, Jap B. Structural basis of water-specific transport  
569 through the AQP1 water channel. *Nature.* 2001;414:872–8.
- 570 27. Munday JC, Eze AA, Baker N, Glover L, Clucas C, Andrés DA, et al.  
571 *Trypanosoma brucei* aquaglyceroporin 2 is a high-affinity transporter for pentamidine  
572 and melaminophenyl arsenic drugs and the main genetic determinant of resistance  
573 to these drugs. *J Antimicrob Chemother.* 2014;69:651–63.
- 574 28. Graf FE, Baker N, Munday JC, de Koning HP, Horn D, Mäser P. Chimerization at  
575 the AQP2-AQP3 locus is the genetic basis of melarsoprol-pentamidine cross-  
576 resistance in clinical *Trypanosoma brucei gambiense* isolates. *Int J Parasitol Drugs*  
577 *Drug Resist.* 2015;5:65–8.
- 578 29. Graf FE, Ludin P, Wenzler T, Kaiser M, Brun R, Pyana PP, et al. Aquaporin 2  
579 Mutations in *Trypanosoma brucei gambiense* Field Isolates Correlate with  
580 Decreased Susceptibility to Pentamidine and Melarsoprol. *PLoS Negl Trop Dis.*  
581 2013;7.
- 582 30. Unciti-Broceta JD, Arias JL, Maceira J, Soriano M, Ortiz-González M,  
583 Hernández-Quero J, et al. Specific Cell Targeting Therapy Bypasses Drug

- 584 Resistance Mechanisms in African Trypanosomiasis. PLoS Pathog. 2015;11:1–20.  
585 31. Pyana PP, Lukusa IN, Ngoyi DM, van Reet N, Kaiser M, Shamamba SK Bin, et  
586 al. Isolation of *Trypanosoma brucei gambiense* from cured and relapsed sleeping  
587 sickness patients and adaptation to laboratory mice. PLoS Negl Trop Dis. 2011;5:1–  
588 6.
- 589 32. Graf FE, Baker N, Munday JC, Koning HP De, Horn D, Mäser P. Chimerization  
590 at the AQP2 – AQP3 locus is the genetic basis of melarsoprol – pentamidine cross-  
591 resistance in clinical *Trypanosoma brucei gambiense* isolates. Int J Parasitol Drugs  
592 Drug Resist. 2015;5:65–8.
- 593 33. Zoltner M, Leung KF, Alsford S, Horn D, Field MC. Modulation of the Surface  
594 Proteome through Multiple Ubiquitylation Pathways in African Trypanosomes. PLoS  
595 Pathog. 2015;11:1–26.
- 596 34. Raz B, Iten M, Grether-Buhler Y, Kaminsky R, Brun R. The Alamar Blue® assay  
597 to determine drug sensitivity of African trypanosomes (*T.b. rhodesiense* and *T.b.*  
598 *gambiense*) in vitro. Acta Trop. 1997;68:139–47.
- 599 35. Currier RB, Cooper A, Burrell-Saward H, MacLeod A, Alsford S. Decoding the  
600 network of *Trypanosoma brucei* proteins that determines sensitivity to  
601 apolipoprotein-L1. PLoS Pathog. 2018;14:1–26.
- 602 36. Emmerich CH, Cohen P. Optimising methods for the preservation , capture and  
603 identification of ubiquitin chains and ubiquitylated proteins by immunoblotting.  
604 Biochem Biophys Res Commun. 2016;466:1–14.
- 605 37. Sali A, Blundell T. Comparative protein modelling by satisfaction of spatial  
606 restraints. J Mol Biol. 1993;234:779–815.
- 607 38. Webb B, Sali A. Comparative Protein Structure Modeling Using MODELLER.  
608 Curr Protoc Bioinforma. 2016;54.
- 609 39. Gotfryd K, Mosca A, Missel J, Truelsen S, Wang K, Spulber M, et al. Human  
610 adipose glycerol flux is regulated by a pH gate in AQP10. Nat Commun.  
611 2018;9:4749.
- 612 40. Notredame C, Higgins D, Heringa J. T-Coffee: A novel method for fast and  
613 accurate multiple sequence alignment. J Mol Biol. 2000;302:205–17.
- 614 41. Thompson J, Higgins D, Gibson T. CLUSTAL W: improving the sensitivity of  
615 progressive multiple sequence alignment through sequence weighting, position-  
616 specific gap penalties and weight matrix choice. Nucleic Acids Res. 1994;22:4673–  
617 80.

- 618 42. Laskowski R, MacArthur M, Moss D, Thornton J. PROCHECK: a program to  
619 check the stereochemical quality of protein structures. *J Appl Crystallography*.  
620 1993;26:283–91.
- 621 43. Bowers KJ, Chow E, Xu H, Dror RO, Eastwood MP, Gregersen BA, et al.  
622 Scalable Algorithms for Molecular Dynamics Simulations on Commodity Clusters.  
623 *Proc ACM /*. 2006;11–7.
- 624 44. Harder E, Damm W, Maple J, Wu C, Reboul M, Xiang JY, et al. OPLS3: A Force  
625 Field Providing Broad Coverage of Drug-like Small Molecules and Proteins. *J Chem*  
626 *Theory Comput*. 2016;12:281–96.
- 627 45. Ryckaert J-P, Ciccotti G, Berendsen HJC. Numerical integration of the cartesian  
628 equations of motion of a system with constraints: molecular dynamics of n-alkanes. *J*  
629 *Comput Phys*. 1977;23:327–41.
- 630 46. Piper RC, Dikic I, Lukacs GL. Ubiquitin-Dependent Sorting in Endocytosis. *Cold*  
631 *Spring Harb Perspect Biol*. 2014;6:a016808.
- 632 47. Chung W-LL, Leung KF, Carrington M, Field MC. Ubiquitylation is required for  
633 degradation of transmembrane surface proteins in Trypanosomes. *Traffic*.  
634 2008;9:1681–97.
- 635 48. Leung KF, Riley FS, Carrington M, Field MC. Ubiquitylation and developmental  
636 regulation of invariant surface protein expression in trypanosomes. *Eukaryot Cell*.  
637 2011;10:916–31.
- 638 49. Klein N, Neumann J, O’Neil JD, Schneider D. Folding and stability of the  
639 aquaglyceroporin GlpF: Implications for human aquaglyceroporin diseases. *Biochim*  
640 *Biophys Acta - Biomembr*. 2015;1848:622–33.
- 641 50. Cymer F, Schneider D. A single glutamate residue controls the oligomerization,  
642 function, and stability of the aquaglyceroporin GlpF. *Biochemistry*. 2010;49:279–86.
- 643 51. Schmidt V, Sturgis JN. Making Monomeric Aquaporin Z by Disrupting the  
644 Hydrophobic Tetramer Interface. *ACS Omega*. 2017;2:3017–27.
- 645 52. Zoltner M, Horn D, de Koning HP, Field MC. Exploiting the Achilles’ heel of  
646 membrane trafficking in trypanosomes. *Curr Opin Microbiol*. 2016;34:97–103.
- 647 53. J.Clague M, Urbé S. Ubiquitin: Same Molecule, Different Degradation Pathways.  
648 *Cell*. 2010;143:682–5.
- 649 54. Tsubuki S, Saito Y, Tomioka M, Ito H, Kawashima S. Differential inhibition of  
650 calpain and proteasome activities by peptidyl aldehydes of di-leucine and tri-leucine.  
651 *J Biochem*. 1996;119:572–6.

- 652 55. Krogh A, Larsson È, Heijne G Von, Sonnhammer ELL. Predicting  
653 Transmembrane Protein Topology with a Hidden Markov Model : Application to  
654 Complete Genomes. *J Mol Biol.* 2001;305:567–80.
- 655 56. Munday JC, Settimo L, de Koning HP. Transport proteins determine drug  
656 sensitivity and resistance in a protozoan parasite, *Trypanosoma brucei*. *Front*  
657 *Pharmacol.* 2015;6:1–10.
- 658 57. Radivojac, P., Vacic, V., Haynes, C., Cocklin, R. R., Mohan, A., Heyen, J. W.,  
659 Goebel, M. G., and Iakoucheva LM. Identification, Analysis and Prediction of Protein  
660 Ubiquitination Sites. *Proteins Struct Funct Bioinforma.* 2010;78:365–80.
- 661 58. Carrington M, Field MC, Sergeenko T, Wang Y, Bo S. Chaperone Requirements  
662 for Biosynthesis of the Trypanosome Variant Surface Glycoprotein. *PLoS One.*  
663 2010;5:e8468.
- 664 59. Tiengwe C, Koeller CM, Bangs JD, Gilmore R. Endoplasmic reticulum –  
665 associated degradation and disposal of misfolded GPI-anchored proteins in  
666 *Trypanosoma brucei*. *Mol Biol Cell.* 2018;29:2397–409.
- 667 60. Tiengwe C, Muratore KA, Bangs JD. Surface proteins , ERAD and antigenic  
668 variation in *Trypanosoma brucei*. *Cell Microbiol.* 2016;18:1673–88.
- 669 61. Mandal G, Sharma M, Kruse M, Sander-Juelch C, Munro LA, Wang Y, et al.  
670 Modulation of *Leishmania major* aquaglyceroporin activity by a mitogen-activated  
671 protein kinase. *Mol Microbiol.* 2012;85:1204–18.
- 672 62. Sharma M, Mandal G, Mandal S, Bhattacharjee H. Functional role of lysine 12 in  
673 *Leishmania major* AQP1. *Mol Biochem Parasitol.* 2015;201:139–45.
- 674 63. Tamma G, Robben JH, Trimpert C, Boone M, Deen PMT. Regulation of AQP2  
675 localization by S256 and S261 phosphorylation and ubiquitination. *AJP Cell Physiol.*  
676 2011;300:C636–46.
- 677 64. Lu HJ, Matsuzaki T, Bouley R, Hasler U, Qin Q-H, Brown D. The phosphorylation  
678 state of serine 256 is dominant over that of serine 261 in the regulation of AQP2  
679 trafficking in renal epithelial cells. *Am J Physiol Renal Physiol.* 2008;295:F290-4.
- 680 65. Nejsum LN, Zelenina M, Aperia A, Frøkiaer J, Nielsen S. Bidirectional regulation  
681 of AQP2 trafficking and recycling: involvement of AQP2-S256 phosphorylation. *Am J*  
682 *Physiol Renal Physiol.* 2005;288:F930–8.
- 683 66. Kamsteeg EJ, Hendriks G, Boone M, Konings IBM, Oorschot V, van der Sluijs P,  
684 et al. Short-chain ubiquitination mediates the regulated endocytosis of the aquaporin-  
685 2 water channel. *Proc Natl Acad Sci.* 2006;103:604073103.

- 686 67. Kitchen P, Conner MT, Bill RM, Conner AC. Structural Determinants of  
687 Oligomerization of the Aquaporin-4 Channel. *J Biol Chem.* 2016;291:6858–71.
- 688 68. Crane JM, Bennett JL, Verkman AS. Live Cell Analysis of Aquaporin-4 M1 / M23  
689 Interactions and Regulated Orthogonal Array Assembly in Glial Cells. *J Biol Chem.*  
690 2009;284:35850–60.
- 691 69. Jin B, Rossi A, Verkman AS. Model of Aquaporin-4 Supramolecular Assembly in  
692 Orthogonal Arrays Based on Heterotetrameric Association of M1-M23 Isoforms.  
693 *Biophys J.* 2011;100:2936–45.
- 694 70. Furman CS, Gorelick-feldman DA, Davidson KG V., Yasumura T, Neely JD, Agre  
695 P, et al. Aquaporin-4 square array assembly : Opposing actions of M1 and M23  
696 isoforms. *Proc Natl Acad Sci.* 2003;100:13609–14.
- 697 71. Silberstein C, Bouley R, Huang Y, Fang P, Pastor-soler N, Brown D, et al.  
698 Membrane organization and function of M1 and M23 isoforms of aquaporin-4 in  
699 epithelial cells. *Am J Physiol Renal Physiol.* 2004;287:501–11.
- 700 72. De Koning HP. Uptake of pentamidine in *Trypanosoma brucei brucei* is mediated  
701 by three distinct transporters: Implications for cross-resistance with arsenicals. *Mol*  
702 *Pharmacol.* 2001;59:586–92.
- 703 73. Collett CF, Kitson C, Baker N, Steele-Stallard HB, Santrot M-V, Hutchinson S, et  
704 al. Chemogenomic Profiling of Antileishmanial Efficacy and Resistance in the  
705 Related Kinetoplastid Parasite *Trypanosoma brucei* . *Antimicrob Agents Chemother.*  
706 2019;63:1–19.
- 707 74. Fairlamb AH, Horn D. Melarsoprol Resistance in African Trypanosomiasis.  
708 *Trends Parasitol.* 2018;34:481–92.
- 709  
710  
711  
712  
713  
714  
715  
716  
717  
718

## 719 **Figure legends**

720

721 **Figure 1. Schematic representation of constructs used in this study. A)** 3D  
722 structural predictions of the AQP2 harbouring three haemagglutinin tags at either  
723 terminus. **Top panel**; lateral and cytoplasmic face view of simulated model of *T. brucei*  
724 AQP2 tetramer embedded in a POPC lipid bilayer. Lipids are shown in surface and  
725 line representations in cyan. Each monomer of AQP2 is shown in cartoon  
726 representation. **Bottom panel**; lateral and cytoplasmic face view of *T. brucei* AQP2  
727 showing key amino acids (in spheres) from NSA (cyan), NPS (orange) and IVLL  
728 (magenta) domains. **B)** N- and C-terminal tagged TbAQP2 variants with a tandem of  
729 three hemagglutinin (3xHA) epitopes. Positions of predicted *trans*-membrane domains  
730 (TMD) are indicated with numbers above solid blocks. Similarly, lysine residues that  
731 were manipulated in this study are highlighted. **C)** Wild type TbAQP1 (blue), TbAQP2  
732 (grey), TbAQP3 (green), and chimeras used (40AT, AQP2<sup>TMD4</sup>, and AQP2<sup>TMD5</sup>). TMDs  
733 for AQP1, 2 and 3 are shown as blocks and in blue, grey and green, respectively.

734

735 **Figure 2. Characterisation of tagged TbAQP2. A)** Fluorescence microscopy of *T.*  
736 *brucei* 2T1 cells expressing tetracycline-regulated N- or C-terminal tagged AQP2  
737 (<sup>3xHA</sup>AQP2 or AQP2<sup>3xHA</sup>, respectively, in yellow). These proteins localise similar to  
738 ISG75 (magenta) at the flagellar pocket/endosomes. The triple *aqp*-null *T. brucei* 2T1  
739 cells ( $\Delta$ AQP) were also included as control. Scale bar 5  $\mu$ m. **B)** Tet-regulated  
740 expression of N- or C-terminal HA-tagged AQP2. Both native-PAGE (upper panel) and  
741 SDS-PAGE (lower panel)  $\alpha$ HA blots are shown.  $\alpha$ - $\beta$  tubulin was used as loading  
742 control. The presence of the different oligomeric species is indicated in the right-hand  
743 side of the panel. Note the presence of a high molecular weight form under SDS-  
744 PAGE in <sup>3xHA</sup>AQP2 but not AQP2<sup>3xHA</sup>. The triple *aqp*-null *T. brucei* 2T1 cells ( $\Delta$ AQP)  
745 were also included as control. **C)** EC<sub>50</sub> values for pentamidine (**left panel**) or  
746 salicylhydroxamic acid (SHAM; **right panel**) with or without 5 mM glycerol following  
747 expression of either <sup>3xHA</sup>AQP2 or AQP2<sup>3xHA</sup>. For multiparametric ANOVA, we  
748 compared the average values (n = 4 independent replicates) from wild type *T. brucei*  
749 2T1 cells as reference for pentamidine, or from *aqp*-null cells for SHAM. \*  $p < 0.01$ , \*\*  
750  $p < 0.001$ , \*\*\*  $p < 0.0001$  from four independent replicates. **D) Left panel**;  
751 Representative western blotting (n = 3 independent replicates) from protein turnover

752 assay monitored by cycloheximide (CHX) treatment in *T. brucei* 2T1 cells expressing  
753 either  $^{3xHA}$ AQP2 (upper panel) or AQP2 $^{3xHA}$  (lower panel). **Right panel**; Protein  
754 quantification from western blotting analysis in left panel for either  $^{3xHA}$ AQP2 (black  
755 square) or AQP2 $^{3xHA}$  (grey circles). Results are the mean  $\pm$  standard deviation of three  
756 independent experiments ( $n = 3$  independent replicates). The estimated half-life ( $t_{1/2}$ )  
757 was calculated based on regression analysis using PRISM.

758

759 **Figure 3. TbAQP2 is ubiquitylated in *T. brucei*.** **A)** Cells expressing  $^{3xHA}$ AQP2 were  
760 treated with either  $NH_4^+Cl$  (10 mM) or MG132 (25  $\mu$ M) for 1h prior to harvesting. Cell  
761 lysates were resolved in a 4-12% acrylamide gel and detected with anti-HA antibody  
762 by western blotting. The intensity of anti- $\beta$  tubulin was used as loading control. **B)**  
763 Immunoprecipitation of  $\Delta aqp$  or  $^{3xHA}$ AQP2 cell lysates with anti-HA beads followed by  
764 anti-ubiquitin detection by western blotting. An anti-HA blot was also included to  
765 confirm protein expression upon induction with tetracycline. Anti- $\beta$  tubulin was used  
766 as loading control. **C)** As in (B), but immunoprecipitation conducted using ubiquitin  
767 capture matrix and analysed by western blotting (left panel). The total (“T”), unbound  
768 (“Unb.”), wash (“W”), and elution (“E”) fractions were resolved by SDS-PAGE  
769 electrophoresis and analysed with anti-HA immunoblotting (right panel).

770

771 **Figure 4. TbAQP2 transits through the endosomal compartment and is**  
772 **efficiently delivered and degraded in the lysosome.** **A)** Cell lines expressing a  
773 tetracycline-regulated copy of  $^{3xHA}$ AQP2 (Alexa Fluor 488; yellow) were co-stained  
774 with anti-TbRab5a and anti-TbRab5b (early endosomes), anti-TbRab11 (recycling  
775 endosomes), and anti-p67 (lysosome). All endosomal and lysosomal markers were  
776 labelled with secondary antibodies coupled to Alexa Fluor 568 (magenta). DAPI (cyan)  
777 was used to label the nucleus and kinetoplast. Scale bars 5  $\mu$ m. A schematic depiction  
778 of the results from confocal microscopy is included in the right panel, generated with  
779 BioRender. **B) Left panel**; Protein turnover was monitored by cycloheximide (CHX)  
780 treatment. Cells were harvested at various times and the protein level monitored by  
781 immunoblotting. ISG75 was included as a control. **Right panel**; Quantification for  
782 ISG75 and  $^{3xHA}$ AQP2. Results are the mean  $\pm$  standard deviation of three independent  
783 experiments. **C) Upper panel**; As in (B), but cells were untreated or exposed to 100  
784 nM of bafilomycin A1 (BafA1), or to 25  $\mu$ M of MG132 for 1 h prior to harvesting. Cell



785 lysates were resolved by SDS-PAGE followed by western immunoblotting using anti-  
786 HA antibody. **Lower panel**; Quantification from three independent experiments -  
787 dotted line represents 100% (signal at 0h). Data presented as mean  $\pm$  standard  
788 deviation (n= 3 independent replicates). Statistical analysis was conducted using *t* test;  
789 \*  $p < 0.01$  and the signal from untreated cells at 1 h as reference.

790

791 **Figure 5. N-terminal lysine residues in the N-terminal cytoplasmic tail are**  
792 **important for protein stability, oligomerisation, and anterograde transport. A)**

793 **Left panel**; Structural predictions of  $3^x\text{HA}$ AQP2 generated with i-Tasser, indicating the  
794 three N-terminal lysine residues (magenta) mutated in AQP2 $^{3K>R}$ . The 3xHA tag has  
795 been omitted for simplicity. **Right panel**; Fluorescence microscopy of cells expressing

796 N-terminal HA-tagged wild type AQP2 (AQP2 $^{\text{WT}}$ ) or lysine mutant AQP2 $^{3K>R}$ . Both  
797 proteins are shown in yellow. DAPI (cyan) was used to label the nucleus (N) and the  
798 kinetoplast (K). Scale bars, 5  $\mu\text{m}$ . Western blot of cell lysates upon induction with

799 tetracycline are also included. **B)** EC $_{50}$  values for pentamidine (**left panel**) and  
800 salicylhydroxamic acid (SHAM) with or without 5 mM glycerol (**right panel**) following

801 recombinant expression of either AQP2 $^{\text{WT}}$  or AQP2 $^{3K>R}$  with a tetracycline-regulated  
802 (Tet-on) copy in *T. brucei* 2T1 bloodstream forms. Multiparametric ANOVA calculated  
803 as for Figure 4 (N = 3 independent replicates). **C)** Cell lines expressing AQP2 $^{\text{WT}}$  or

804 AQP2 $^{3K>R}$  (Alexa Fluor 488; yellow) were co-stained with anti-BiP (endoplasmic  
805 reticulum marker). All markers were labelled with secondary antibodies coupled to  
806 Alexa Fluor 568 (magenta). DAPI (cyan) was used to label the nucleus and the  
807 kinetoplast, as indicated in (A). Scale bars, 5  $\mu\text{m}$ . **D)** Native-PAGE immunoblot of total

808 cell lysates expressing either AQP2 $^{\text{WT}}$  or AQP2 $^{3K>R}$ . Coomassie blue staining of the  
809 same fractions was used as loading control. The triple *aqp*-null *T. brucei* 2T1 cells  
810 ( $\Delta\text{AQP}$ ) were also included as control. **E) Left panel**; Protein turnover monitored as

811 in Figure 4 for AQP2 $^{\text{WT}}$  or AQP2 $^{3K>R}$ . Cells were either untreated or treated with 25  $\mu\text{M}$   
812 MG132 for 1 h prior to harvest. Cells were harvested at 0 hours and 2 h post-CHX  
813 treatment, and lysates analysed by immunoblotting.  $\alpha$ - $\beta$  tubulin was used as loading

814 control. **Right panel**; Protein quantification representing the mean  $\pm$  standard  
815 deviation (n = 3 independent replicates). Dotted line represents 100% (signal in  
816 untreated samples). Statistical analysis was conducted using the signal from untreated

817 cells at 2 h as reference group. \*\*  $p < 0.001$ , ns = not significant, using a *t* test.

818 **Figure 6. Requirement for cytoplasmic-oriented lysine residues for AQP2**  
819 **stability and trafficking. A)** Cell lines expressing a tetracycline-regulated copy of the  
820 constructs mentioned in (A) (Alexa Fluor 488; yellow) were co-stained with either  $\alpha$ BiP  
821 (ER) or  $\alpha$ ISG75 (localises to flagellar pocket/endosome), both stained with secondary  
822 antibodies coupled to Alexa Fluor 568 (magenta). DAPI (cyan) was used to label the  
823 nucleus and the kinetoplast. Scale bars, 5  $\mu$ m. **B)** Representative western blot (n = 3  
824 independent replicates) of protein turnover monitored by cycloheximide (CHX)  
825 treatment followed by pulse-chase of cells expressing the constructs in (A). Cells were  
826 either untreated or treated with 25  $\mu$ M MG132 for 1 h prior to harvest. Cells were  
827 harvested at 0 hours and 2 h post-CHX treatment and analysed by immunoblotting.  
828 Uninduced controls (“Un.”) were also included. **C)** EC<sub>50</sub> values (average  $\pm$  standard  
829 deviation; n = 3 independent replicates) of pentamidine (upper panel) and  
830 salicylhydroxamic acid (SHAM) with or without 5 mM glycerol (lower panel) following  
831 recombinant expression of either AQP2<sup>WT</sup>, AQP2<sup>5K>R</sup>, or single arginine-to-lysine  
832 AQP2 mutants (AQP2<sup>R19K</sup>, AQP2<sup>R45K</sup>, and AQP2<sup>R54K</sup>). Statistical test for significance  
833 was conducted using a pairwise *t* test comparison with uninduced cell lines. \* *p*<0.01,  
834 \*\* *p*<0.001, \*\*\* *p*<0.0001.

835

836 **Figure 7. Chimerisation of TbAQP2 leads to mislocalisation, reduction in**  
837 **glycerol transport activity and rapid turnover. A)** Cell lines expressing N-terminal  
838 HA-tagged TbAQP1, TbAQP2, TbAQP3, field-isolate chimeric AQP2/3 (40AT) or a  
839 single TMD mutant (AQP2<sup>TMD4</sup>) (Alexa Fluor 488; yellow) co-stained with anti-ISG75  
840 (magenta). DAPI (cyan) was used to label the nucleus and the kinetoplast. Scale bars  
841 5  $\mu$ m. Western immunoblotting analysis from lysates of cells expressing these  
842 constructs are also included. Anti- $\beta$  tubulin was used as loading control. **B)** BN-PAGE  
843 immunoblot of total cell lysates expressing the constructs in (A). Coomassie blue  
844 staining of the same fractions was used as loading control. **C)** EC<sub>50</sub> values (average  $\pm$   
845 standard deviation; n = 3) for salicylhydroxamic acid (SHAM) with or without 5 mM  
846 glycerol following recombinant expression of the constructs in (A). **D) Left panel;**  
847 Representative western blotting (n = 3 independent replicates) analysis of protein  
848 turnover monitored by cycloheximide (CHX) treatment followed by pulse-chase of cells  
849 expressing the constructs in (A). **Right panel;** Protein quantification representing the  
850 mean  $\pm$  standard deviation of three independent experiments. Dotted line represents

851 50% of protein abundance. Data presented as mean  $\pm$  standard deviation (n = 3  
852 independent replicates).

853

854 **Figure 8. Differential turnover rate of the repertoire of AQPs in the bloodstream**

855 **form of *T. brucei*. A)** Cell lines expressing N-terminal HA-tagged TbAQP1, TbAQP2,

856 TbAQP3, field-isolate chimeric AQP2/3 (40AT) or a single TMD mutant (AQP2<sup>TMD4</sup>)

857 (Alexa Fluor 488; yellow) co-stained with the endoplasmic reticulum marker anti-BiP

858 (magenta). DAPI (cyan) was used to label the nucleus and the kinetoplast. Scale bars,

859 5  $\mu$ m. **B) Upper panel;** Representative western blot (n = 3 independent replicates) of

860 protein turnover monitored by cycloheximide (CHX) treatment followed by pulse-chase

861 assay. Cells were either untreated or treated with 100 nM of Bafilomycin A1 (BafA1)

862 or 25  $\mu$ M of MG132 for 1 h prior to harvest. Cells were harvested at 0 hours and 2 h

863 post-CHX treatment and analysed by immunoblotting. **Lower panel;** Protein

864 quantification representing the mean  $\pm$  standard deviation of three independent

865 experiments (n = 3 independent replicates). Statistical analysis was conducted using

866 the signal from untreated cells at 2 h post-CHX treatment as reference group. \*  $p < 0.01$ ,

867 \*\*  $p < 0.001$ , ns = not significant, using a *t*-test.

868 **Supplementary material for:**

869

870 **Instability of aquaglyceroporin 2 contributes to drug resistance in**

871 ***Trypanosoma brucei***

872

873 Juan F. Quintana<sup>1</sup>, Juan Bueren-Calabuig<sup>1</sup>, Fabio Zuccotto<sup>1</sup>, Harry de Koning<sup>2</sup>, David

874 Horn<sup>1</sup>, and Mark C. Field<sup>1,3\*</sup>

875

876 <sup>1</sup>School of Life Sciences, University of Dundee, Dow Street, Dundee DD1 5EH, UK.

877 <sup>2</sup>Institute of Infection, Immunity, and Inflammation, University of Glasgow, Glasgow,

878 UK. <sup>3</sup>Biology Centre, Institute of Parasitology, Biology Centre, Czech Academy of

879 Sciences, Ceske Budejovice, Czech Republic.

880

881

882 **Supplementary figure legends**

883

884 **Figure S1. Characterisation of *T. brucei* 2T1 cell lines expressing N- or C-**

885 **terminal tagged TbAQP2. A)** Proliferation was estimated over a period of four days

886 *in vitro* in the presence or absence of tetracycline for <sup>3xHA</sup>AQP2 (middle panel) or

887 AQP2<sup>3xHA</sup> (right panel) cell lines. *T. brucei* 2T1 wild type *aqp*-null cell lines (left panel)

888 were included as the parental strain. **B)** Dose-response curves for pentamidine from

889 *T. brucei* 2T1 wild type of *aqp*-null cell lines (left panel), <sup>3xHA</sup>AQP2 (middle panel), and

890 AQP2<sup>3xHA</sup> (right panel). **C)** Dose-response curves for SHAM (left panels) or SHAM

891 plus 5 mM glycerol (right panels), with the same lines as in panels A and B.

892

893 **Figure S2. 3xHA C-terminally tagged AQP2 transits through endosomes and is**

894 **delivered into the lysosome.** Cell lines expressing a tetracycline-regulated copy of

895 AQP2<sup>3xHA</sup> (Alexa Fluor 488; yellow) were co-stained with anti-TbRab5a and anti-

896 TbRab5b (early endosomes), anti-TbRab11 (recycling endosomes) and anti-p67

897 (lysosome). All endosomal and lysosomal markers were labelled with secondary

898 antibodies coupled to Alexa Fluor 568 (magenta). DAPI (cyan) was used to label the

899 nucleus and kinetoplast. Scale bars, 5  $\mu$ m.

900

901 **Figure S3. Topological predictions of kinetoplastid aquaglyceroporins.** TbAQP1,  
902 TbAQP2, TbAQP3, a field-isolated chimera AQP2/3 (40AT) and a single TMD mutant  
903 (AQP2<sup>TMD4</sup>) are predicted to have both N- and C-termini facing the cytoplasm and six  
904 TMD. Predictions were generated using TMHMM (v2.0) [55].

905  
906 **Figure S4. Characterisation of *T. brucei* 2T1 cell lines expressing N-terminal**  
907 **tagged TbAQP2<sup>R234K</sup> mutant. A)** Blue native-PAGE immunoblot of total cell lysates  
908 expressing either TbAQP2 (AQP2<sup>WT</sup>), N-terminal lysine-to-arginine mutant  
909 (AQP2<sup>3K>R</sup>), all lysine-to-arginine mutant (AQP2<sup>5K>R</sup>) and individual arginine-to-lysine  
910 mutants (AQP2<sup>R19K</sup>, AQP2<sup>R45K</sup>, and AQP2<sup>R54K</sup>). Coomassie blue staining of the same  
911 lysates was used as loading control. **B)** Blue native-PAGE immunoblot of total cell  
912 lysates expressing the constructs in (A). Coomassie blue of the same fractions was  
913 used as loading control. **C)** Cell lines expressing a tetracycline-regulated copy of wild  
914 type TbAQP2 (AQP2<sup>WT</sup>), N-terminal lysine-to-arginine mutant (AQP2<sup>3K>R</sup>), all lysine-  
915 to-arginine mutant (AQP2<sup>5K>R</sup>) or individual arginine-to-lysine mutants (AQP2<sup>R234K</sup>)  
916 (Alexa Fluor 488; yellow) were co-stained with anti-TbBiP (endoplasmic reticulum)  
917 coupled to Alexa Fluor 568 (magenta). DAPI (cyan) was used to label the nucleus and  
918 the kinetoplast. Scale bars 5  $\mu$ m. **D)** Protein turnover was monitored by cycloheximide  
919 (CHX) treatment followed by chase and western blotting. Prior to treatment, cells were  
920 either untreated or treated with 25  $\mu$ M MG132 for 1 hour. Cells were harvested at 0  
921 and 2 hours post-CHX treatment and cell lysates analysed by western immunoblotting.  
922 Quantification represents mean  $\pm$  standard deviation (n = 3 independent replicates),  
923 and dotted line represents protein abundance at time 0h. Statistical analysis was  
924 conducted using untreated cells at 2 hours as reference group. \*\*  $p < 0.001$ , ns = not  
925 significant, using a *t*-test. EC<sub>50</sub> values for pentamidine **(E)** and salicylhydroxamic acid  
926 (SHAM) **(F)** with or without 5 mM glycerol following expression of AQP2<sup>R234K</sup>.  
927 Statistical analysis was conducted using untreated cells as reference group. \*\*  
928  $p < 0.001$ , ns = not significant, using a *t* test. Note that this is an extended version of  
929 Figure 6A and 6B, and the full panel included for comparison. **G) Left panel;** View  
930 from the cytoplasmic face The TMD4-TMD5 loops in each monomer are highlighted.  
931 K234 is shown as spheres. **Right panel;** Structural overview of *T. brucei* AQP2  
932 homology model. K147 and K234 are shown as spheres. The expanded view of the  
933 conformational change observed during TMD simulations on TMD1 and TMD3 as a

934 result of the K147R mutation. Wild type TbAQP2 is shown in green. TbAQP2  
935 displaying the K147R and K234R mutations is shown in light orange.

936

937 **Figure S5. Protein sequence alignment of wild-type TbAQP2, TbAQP3, and the**  
938 **chimeric AQP2-3 detected in relapsing sleeping sickness patients from the**  
939 **Democratic Republic of Congo.** The sequence alignment was conducted using  
940 Jalview and MUSCLE for multiple sequence alignment. The NPA/NPS selectivity filter  
941 is indicated with red boxes, and predicted *trans*-membrane domain (TMDs) spans are  
942 also indicated.

943

944 **Figure S6. Structural details of TbAQP2 chimerisation and selectivity filters.** 3D  
945 structural predictions of N-terminal tagged TbAQP1 (cyan), TbAQP2 (magenta),  
946 TbAQP3 (green) and the chimeric TbAQP2/3 40AT and AQP2<sup>TMD4</sup>, with the  
947 corresponding domain swap colour-coded. Structures were calculated with i-Tasser.  
948 The 3xHA-tag is omitted for simplicity. Details of the selectivity pore for each of these  
949 proteins (12Å) are also included. For TbAQP2, AQP2<sup>TMD4</sup> and 40AT constructs, the  
950 selectivity filter is composed of the “NSA/NPS” motif, whereas TbAQP1 and TbAQP3  
951 contain a “NPA/NPA” motif.

952

953

**Table 1. Summary of the impact of cytoplasmic lysine mutagenesis on TbAQP2 localisation and function.**

| Protein                                | Localisation          | Protein abundance post-CHX <sup>2</sup> |                | Proposed degradation pathway | EC <sub>50</sub> pentamidine (nM) <sup>3</sup> | EC <sub>50</sub> SHAM (μM) <sup>3</sup> | EC <sub>50</sub> SHAM + 5 mM glycerol (μM) <sup>3</sup> |
|----------------------------------------|-----------------------|-----------------------------------------|----------------|------------------------------|------------------------------------------------|-----------------------------------------|---------------------------------------------------------|
|                                        |                       | Untreated                               | + MG132        |                              |                                                |                                         |                                                         |
| <b>AQP2<sup>WT</sup></b>               | Flagellar pocket      | 61.05 ± 3.43%                           | 44.42 ± 13.15% | Lysosome                     | 3.29                                           | 1.96                                    | 1.16                                                    |
| <b><sup>1</sup>AQP2<sup>R19K</sup></b> | Endoplasmic reticulum | 14.42 ± 9.5%                            | 16.11 ± 7.1%   | ERAD <sup>1</sup>            | 51.18                                          | 1.92                                    | 1.12                                                    |
| <b>AQP2<sup>R45K</sup></b>             | Endoplasmic reticulum | 1.3 ± 0.93%                             | 34.3 ± 4.65%   | ERAD                         | 43.16                                          | 1.99                                    | 2.36                                                    |
| <b>AQP2<sup>R54K</sup></b>             | Endoplasmic reticulum | 10.84 ± 0.5%                            | 41.05 ± 12.5%  | ERAD                         | 43.10                                          | 2.10                                    | 2.38                                                    |
| <b>AQP2<sup>R234K</sup></b>            | Endoplasmic reticulum | 7.67 ± 1.9%                             | 24.91 ± 5.12%  | ERAD                         | 39.95                                          | 1.28                                    | 2.34                                                    |
| <b>AQP2<sup>3K&gt;R</sup></b>          | Endoplasmic reticulum | 5.16 ± 0.62%                            | 46.18 ± 5.95%  | ERAD                         | 27.20                                          | 10.10                                   | 10.14                                                   |
| <b>AQP2<sup>5K&gt;R</sup></b>          | Endoplasmic reticulum | 16.8 ± 6.2%                             | 37.5 ± 9.5%    | ERAD                         | 41.98                                          | 1.34                                    | 1.25                                                    |

<sup>1</sup>AQP2<sup>R19K</sup> did not show a significant accumulation upon MG132 treatment, but co-localized with TbBiP, indicating probable ERAD-mediated turnover. <sup>2</sup>Protein abundance was calculated 2h post-treatment with cycloheximide (CHX) and expressed as percent of protein abundance compared to protein signal before treatment (“time 0h”). <sup>3</sup>Estimated EC<sub>50</sub> values from cells induced with tetracycline, 1 μg/ml for 24h.

**Table 2. Summary of the impact of chimerisation on TbAQP2 localisation and function.**

| <b>Protein</b>             | <b>Sequence source</b> | <b>Localisation</b> | <b>Half-life (h)</b> | <b>EC<sub>50</sub> pentamidine (nM)<sup>1</sup></b> | <b>EC<sub>50</sub> SHAM (μM)<sup>1</sup></b> | <b>EC<sub>50</sub> SHAM + 5 mM glycerol (μM)<sup>1</sup></b> |
|----------------------------|------------------------|---------------------|----------------------|-----------------------------------------------------|----------------------------------------------|--------------------------------------------------------------|
| <b>TbAQP1</b>              | Wild type              | Flagellar base      | 4.34                 | 10.08                                               | 3.02                                         | 1.45                                                         |
| <b>TbAQP2</b>              | Wild type              | Flagellar pocket    | 4.83                 | 3.29                                                | 1.96                                         | 1.16                                                         |
| <b>TbAQP3</b>              | Wild type              | Plasma membrane     | 1.15                 | 10.23                                               | 1.28                                         | 1.14                                                         |
| <b>40AT</b>                | Chimera                | Plasma membrane     | 1.64                 | 10.34                                               | 1.39                                         | 1.12                                                         |
| <b>AQP2<sup>TMD4</sup></b> | Chimera                | Plasma membrane     | <1h                  | 10.24                                               | 0.74                                         | 0.64                                                         |

<sup>1</sup>Estimated EC<sub>50</sub> values from cells induced with tetracycline, 1 μg/ml for 24h.



**Figure 1**

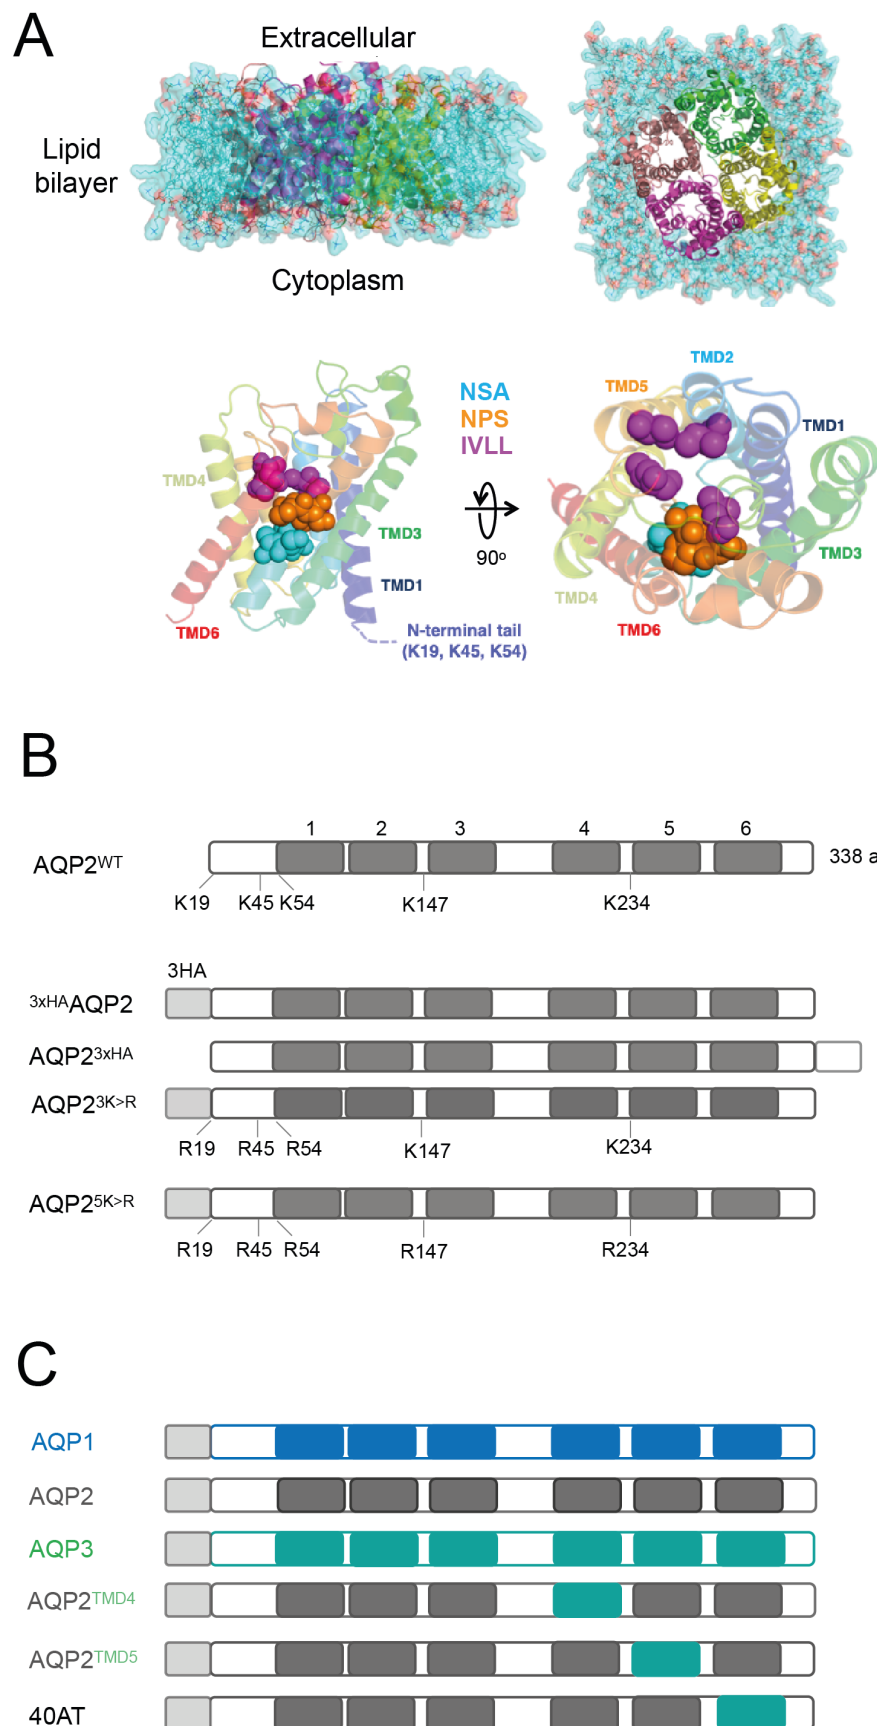

**Figure 2**

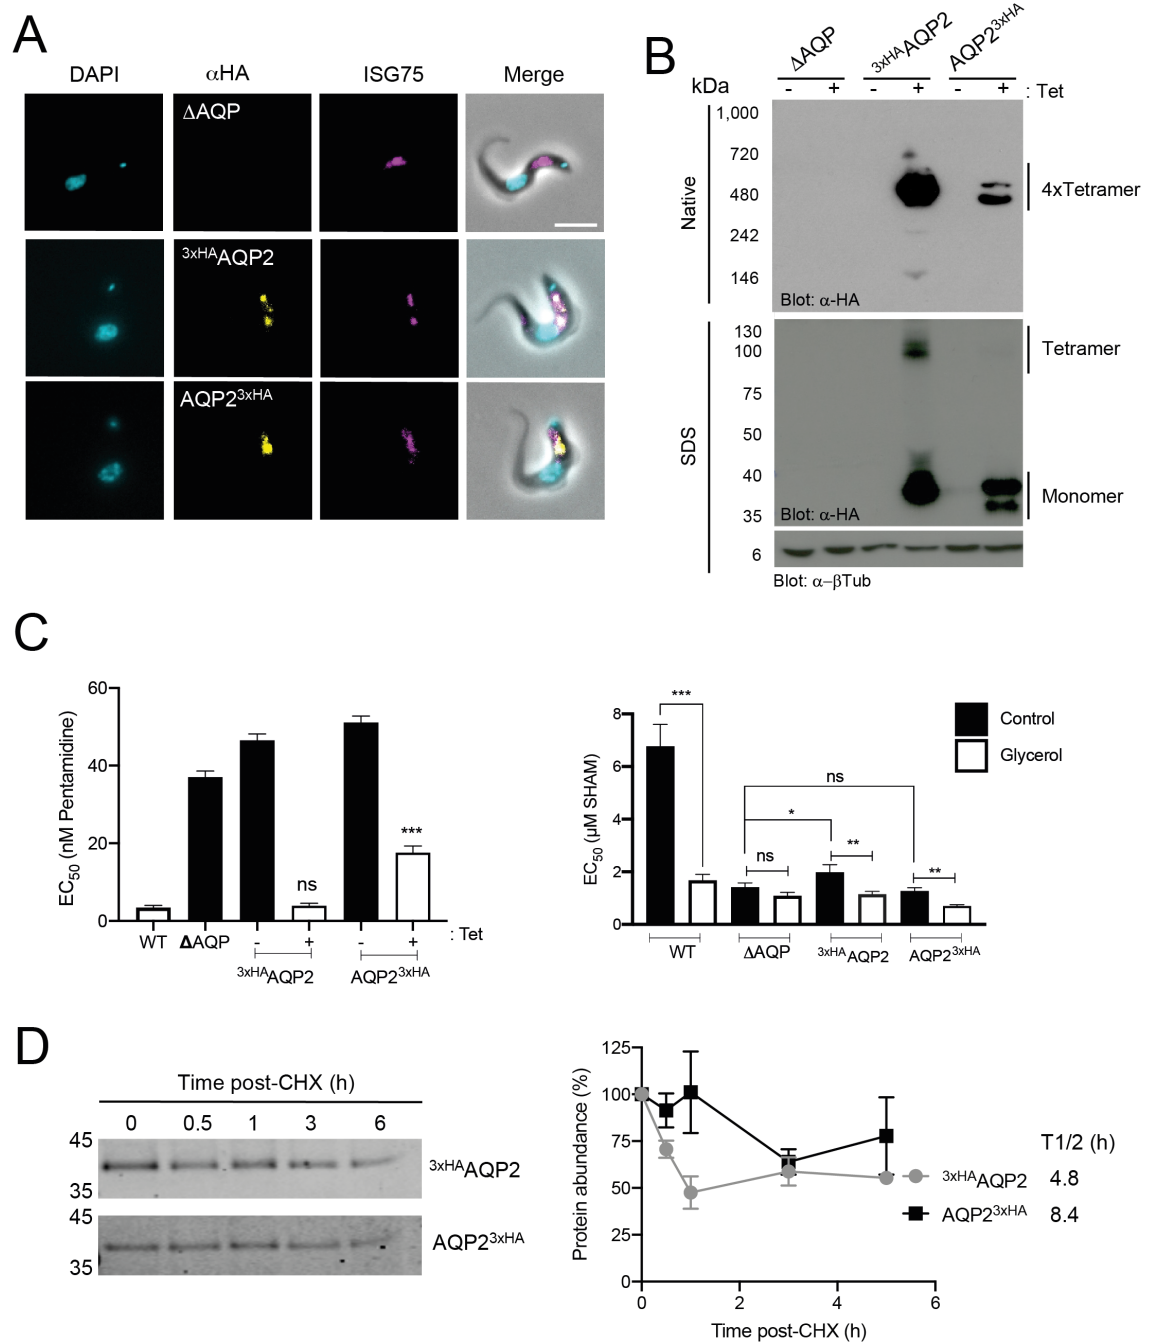

**Figure 3**

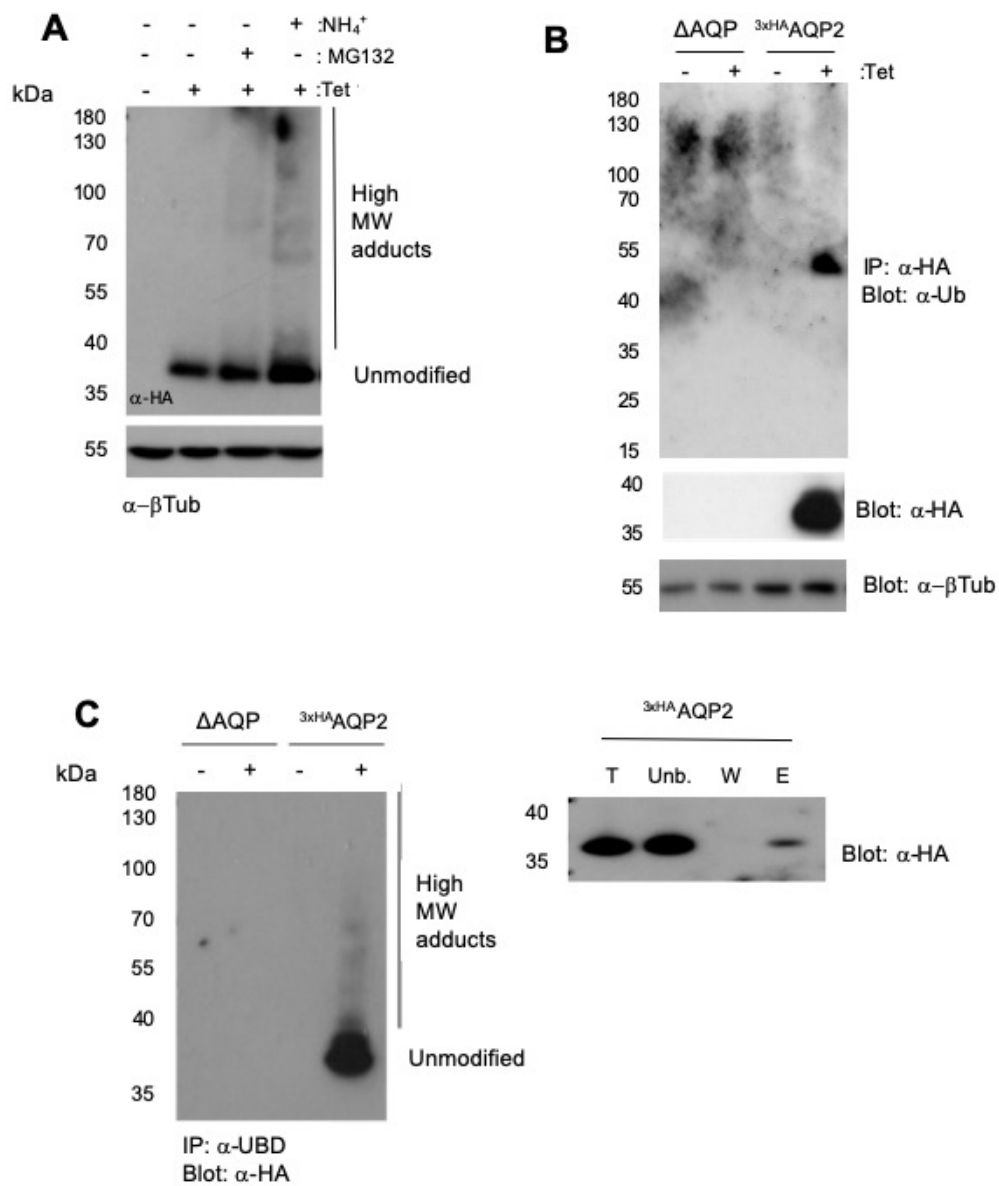

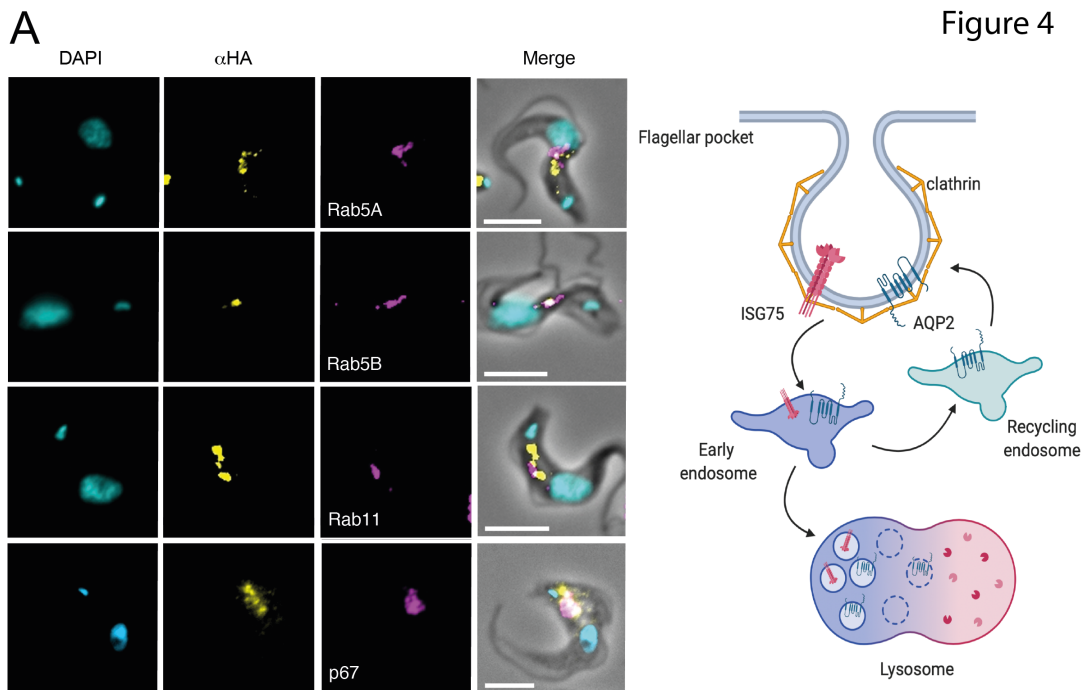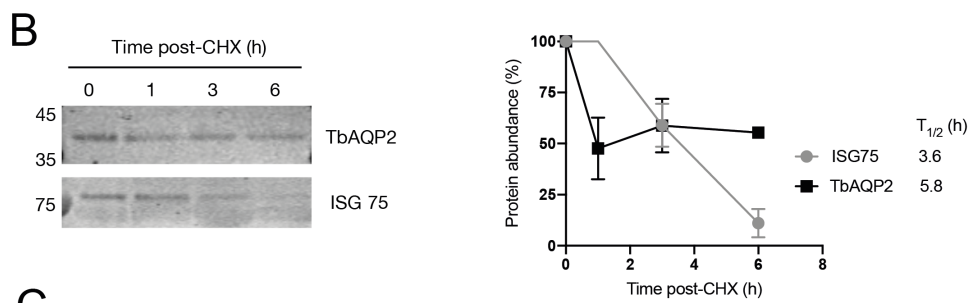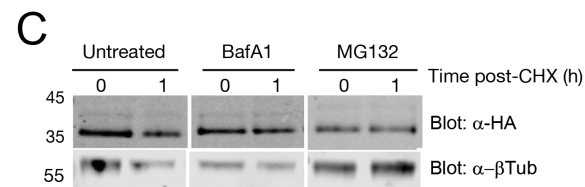

**Figure 5**

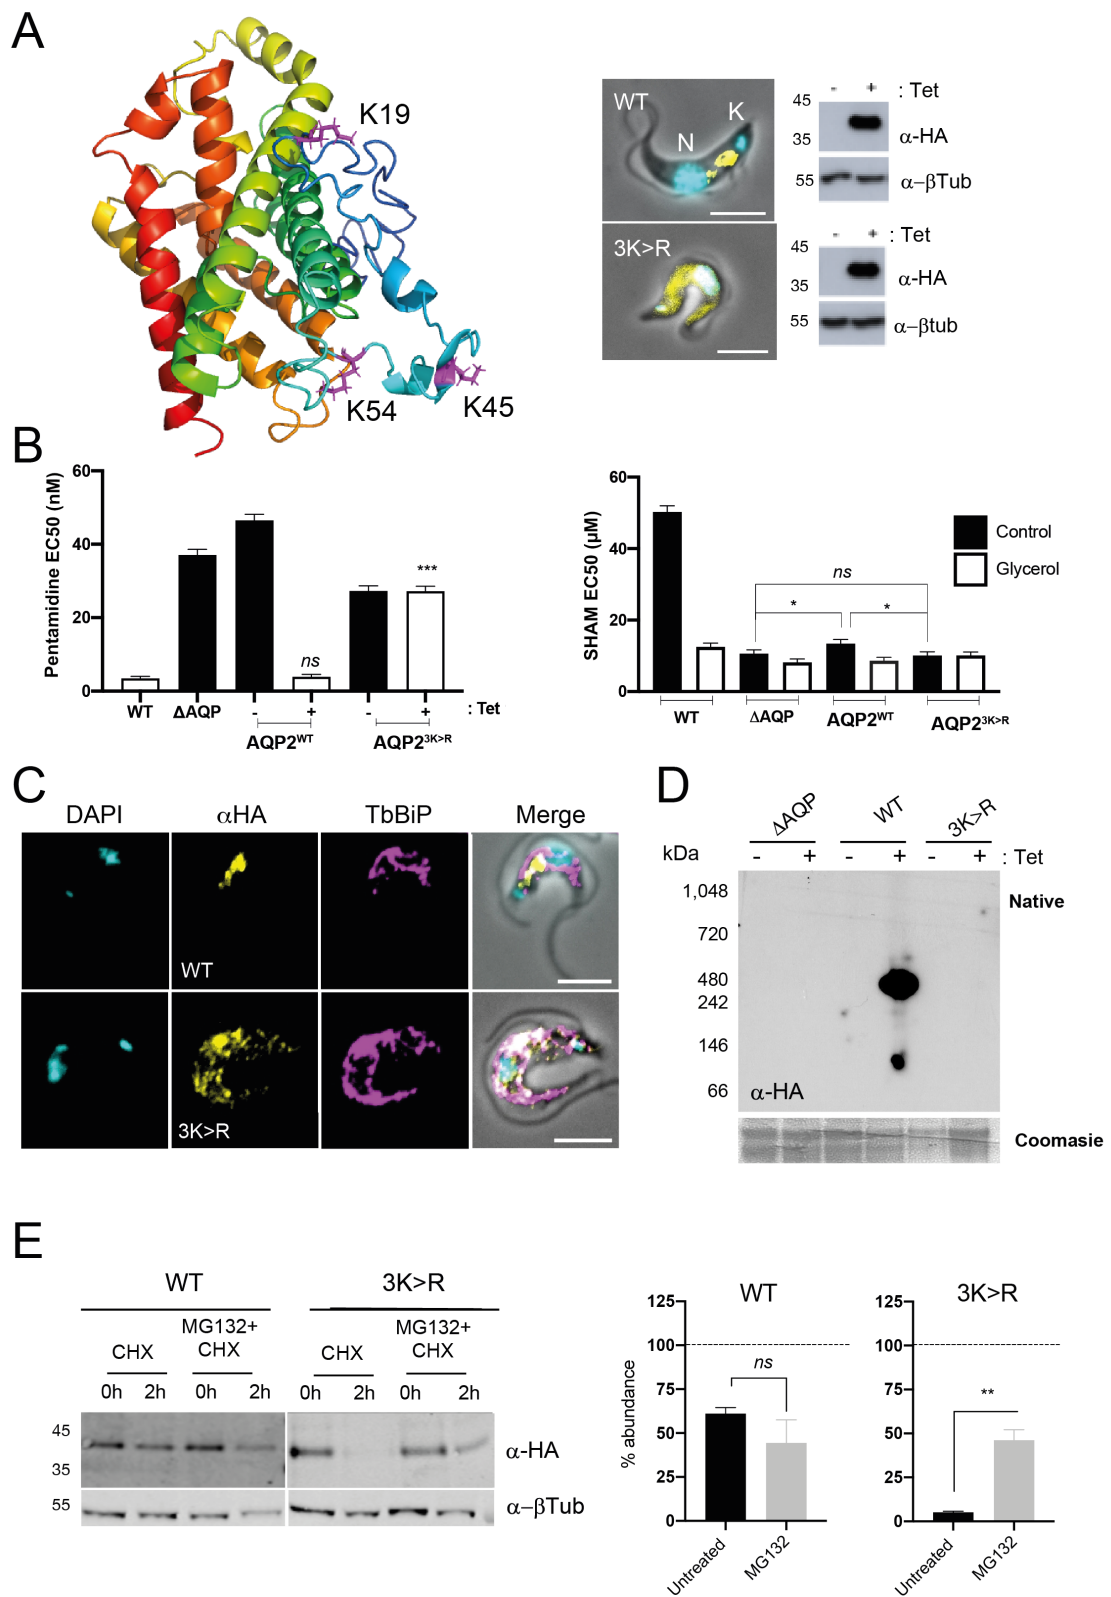

## Figure 6

### A

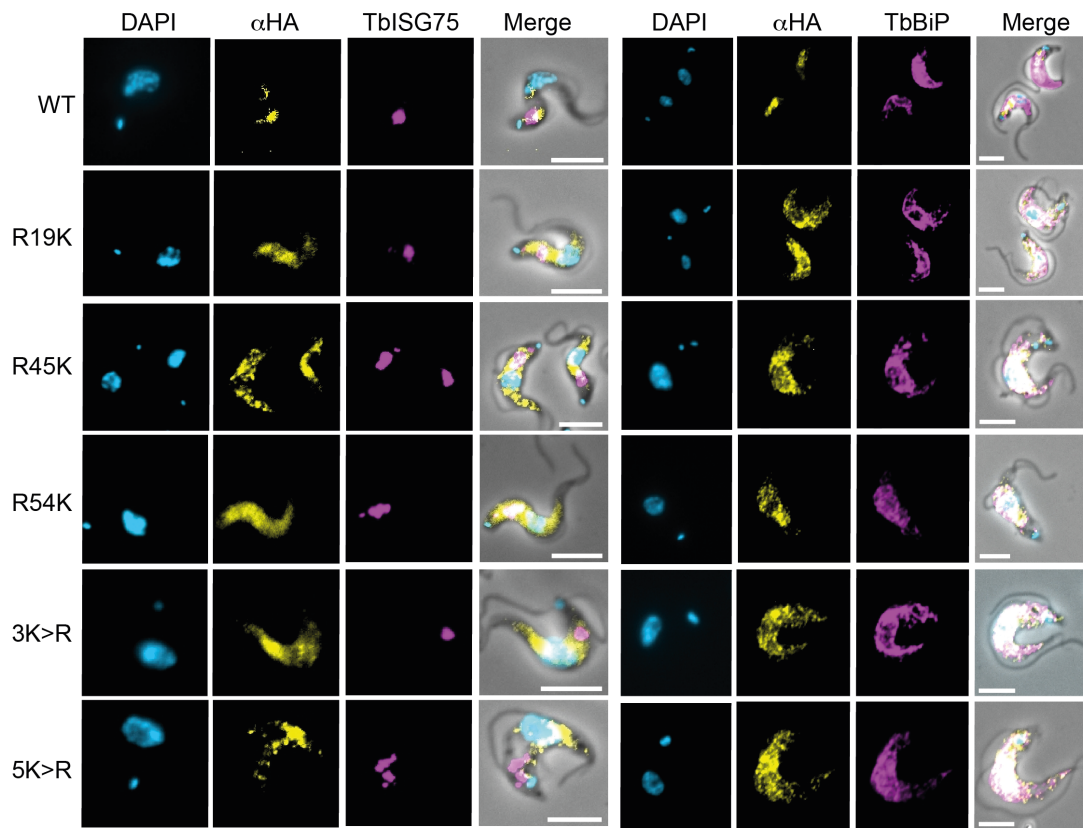

### B

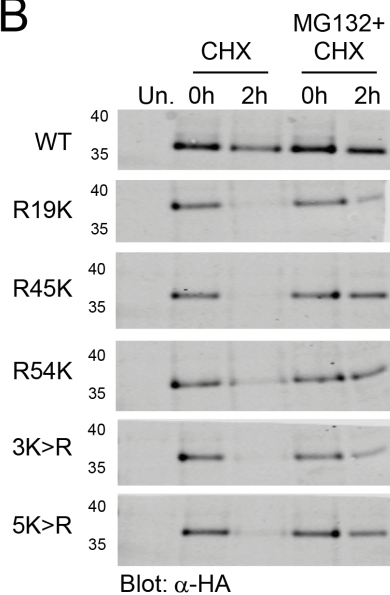

### C

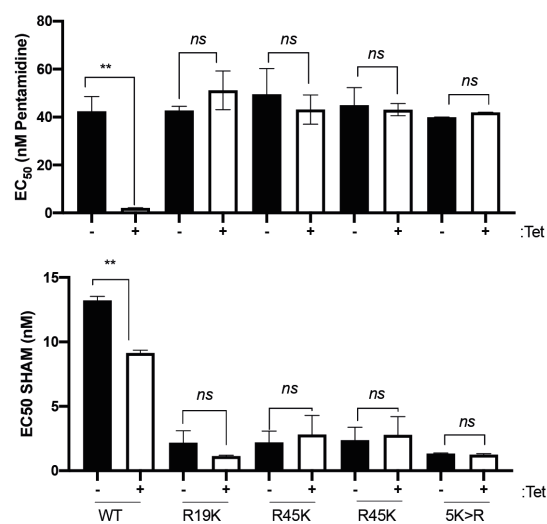

**Figure 7**

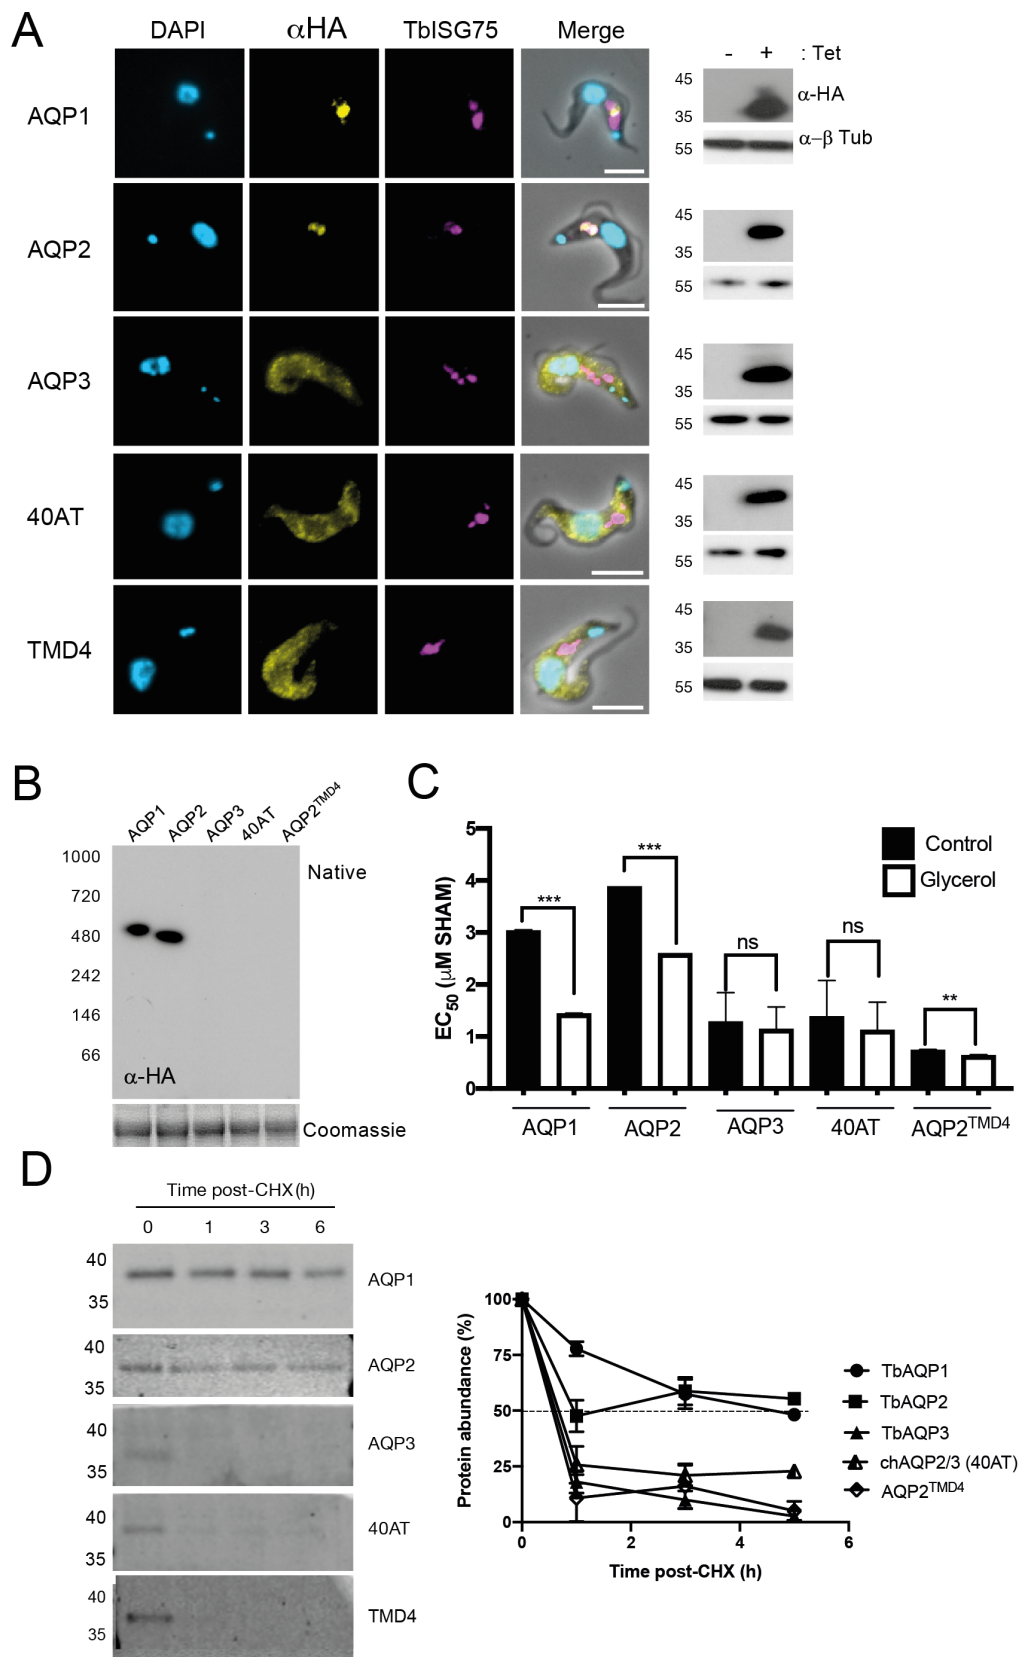

## Figure 8

A

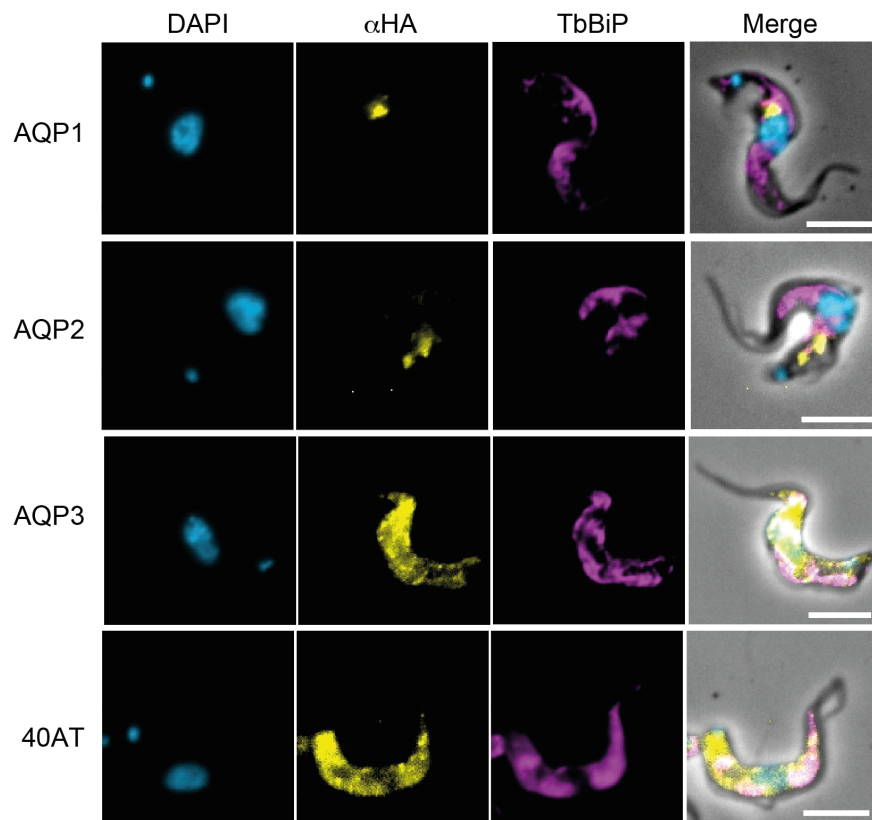

B

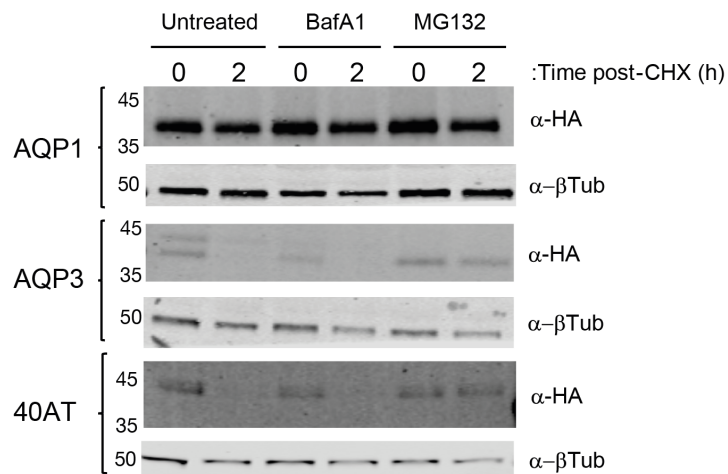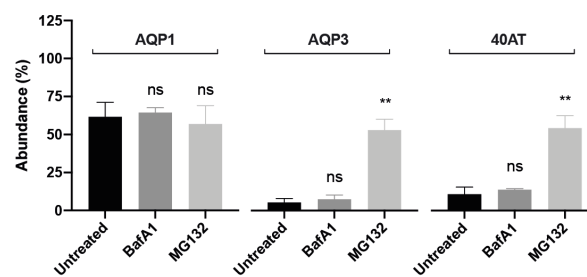



## Figure S1

A

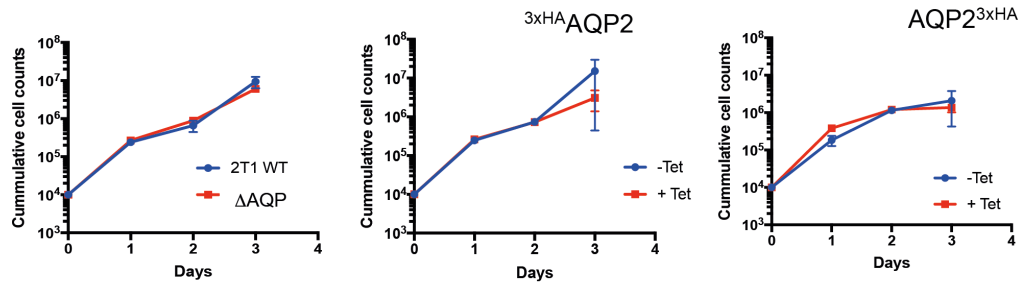

B

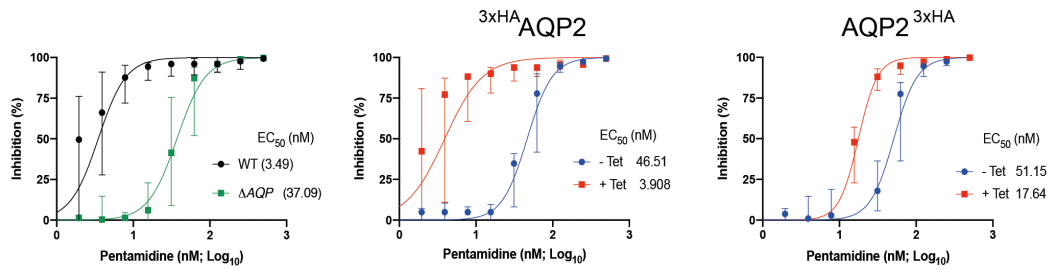

C

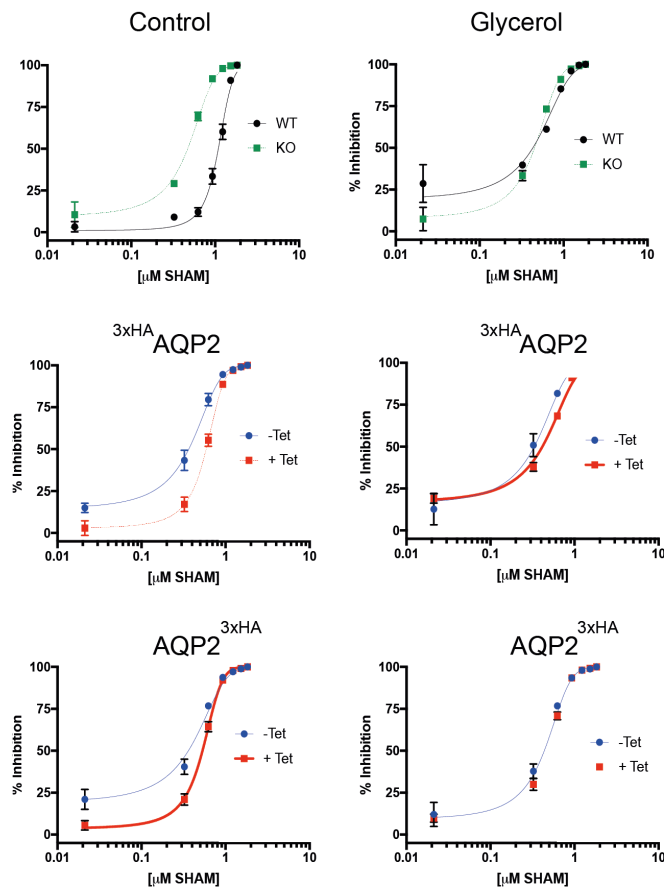

**Figure S2**

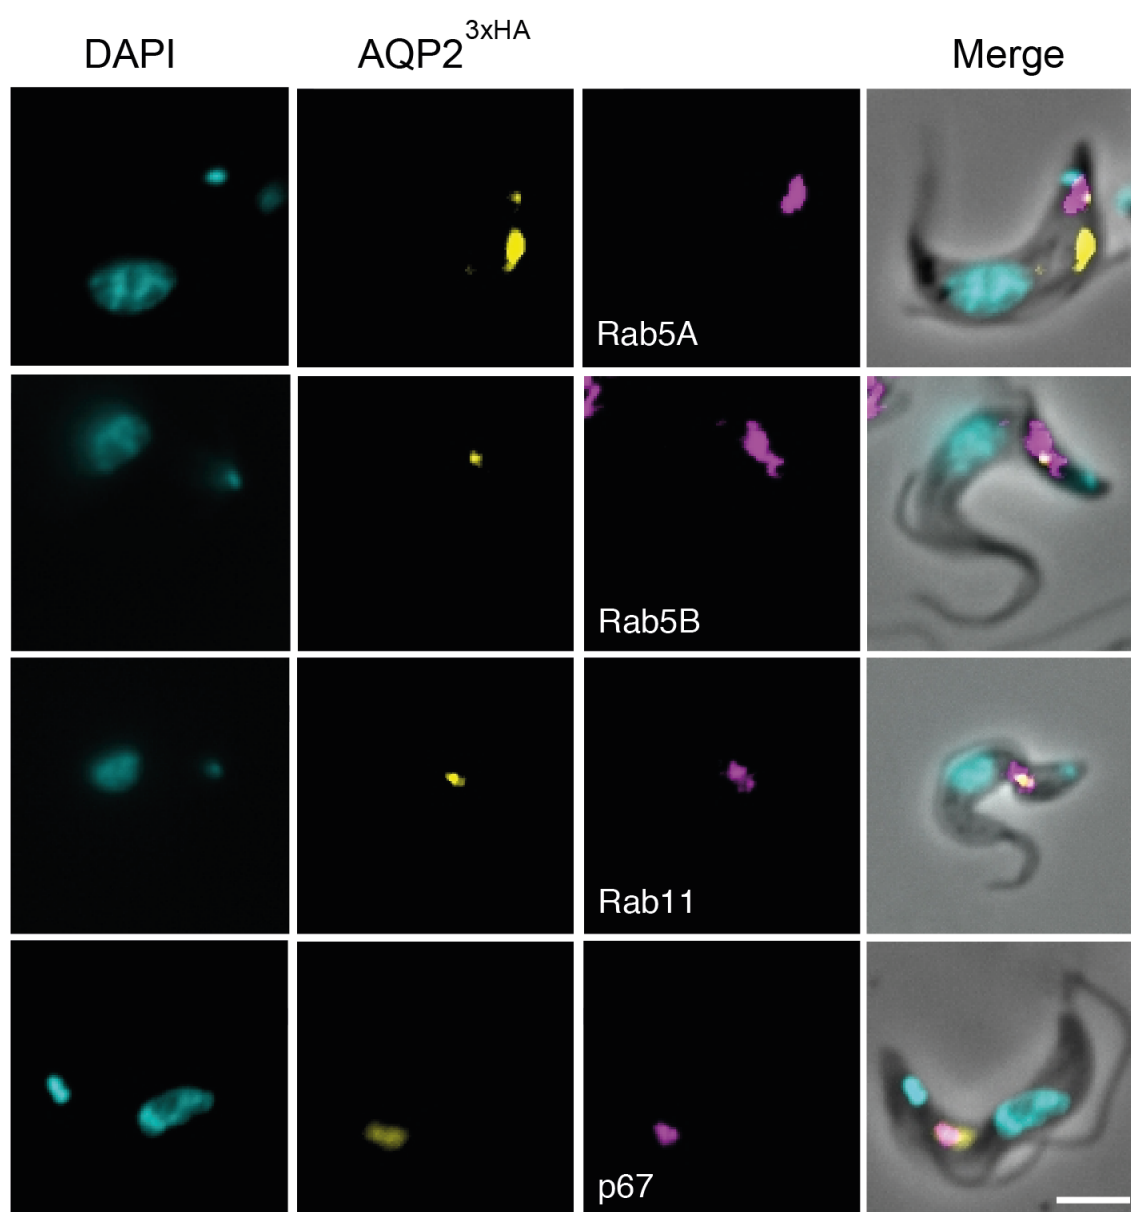

**Figure S3**

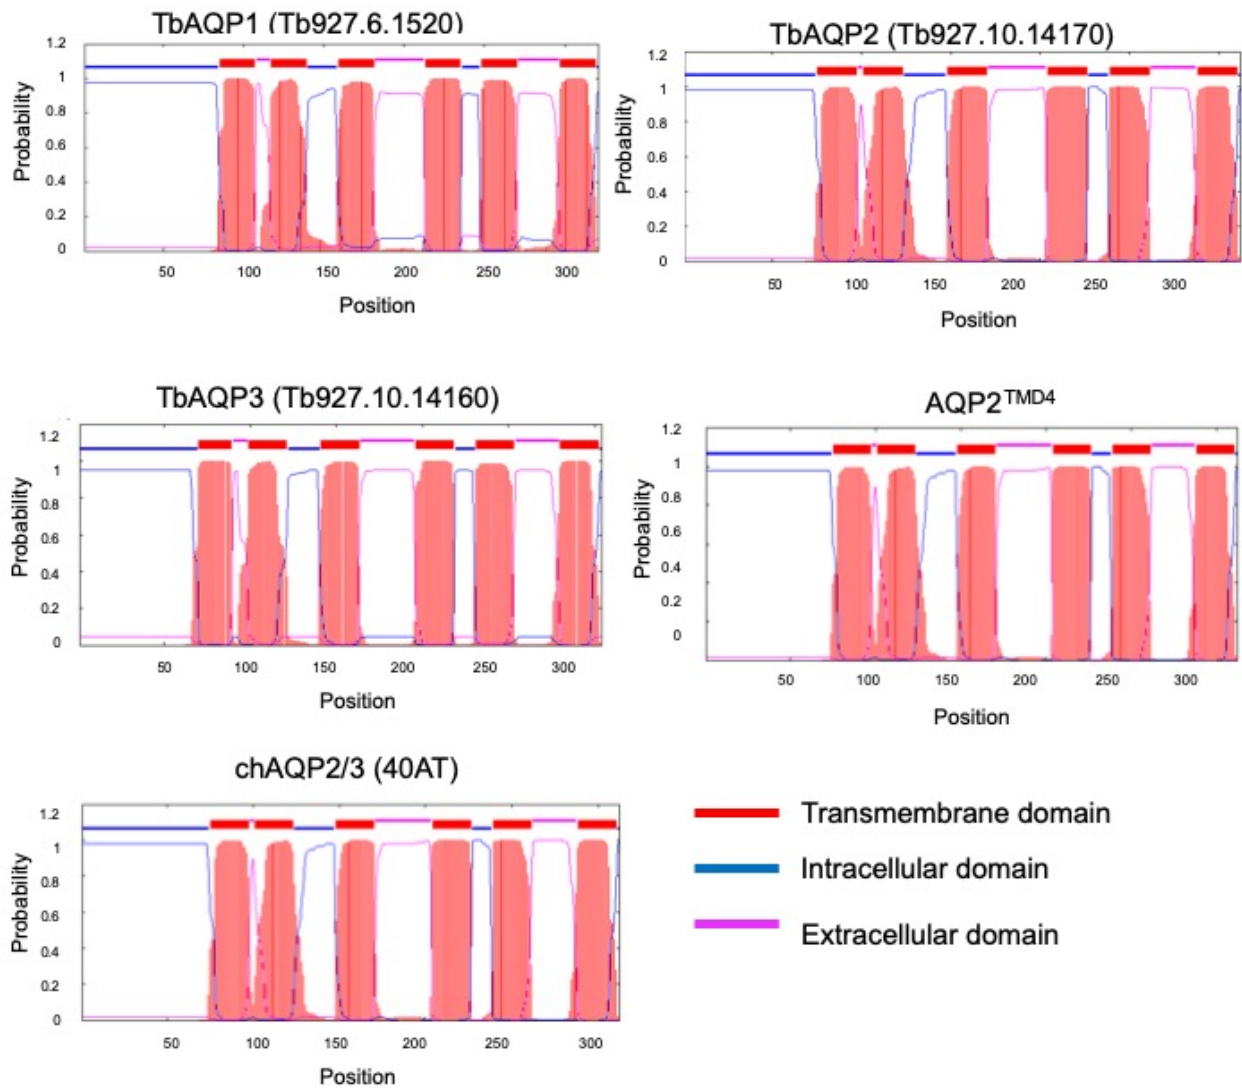

## Figure S4

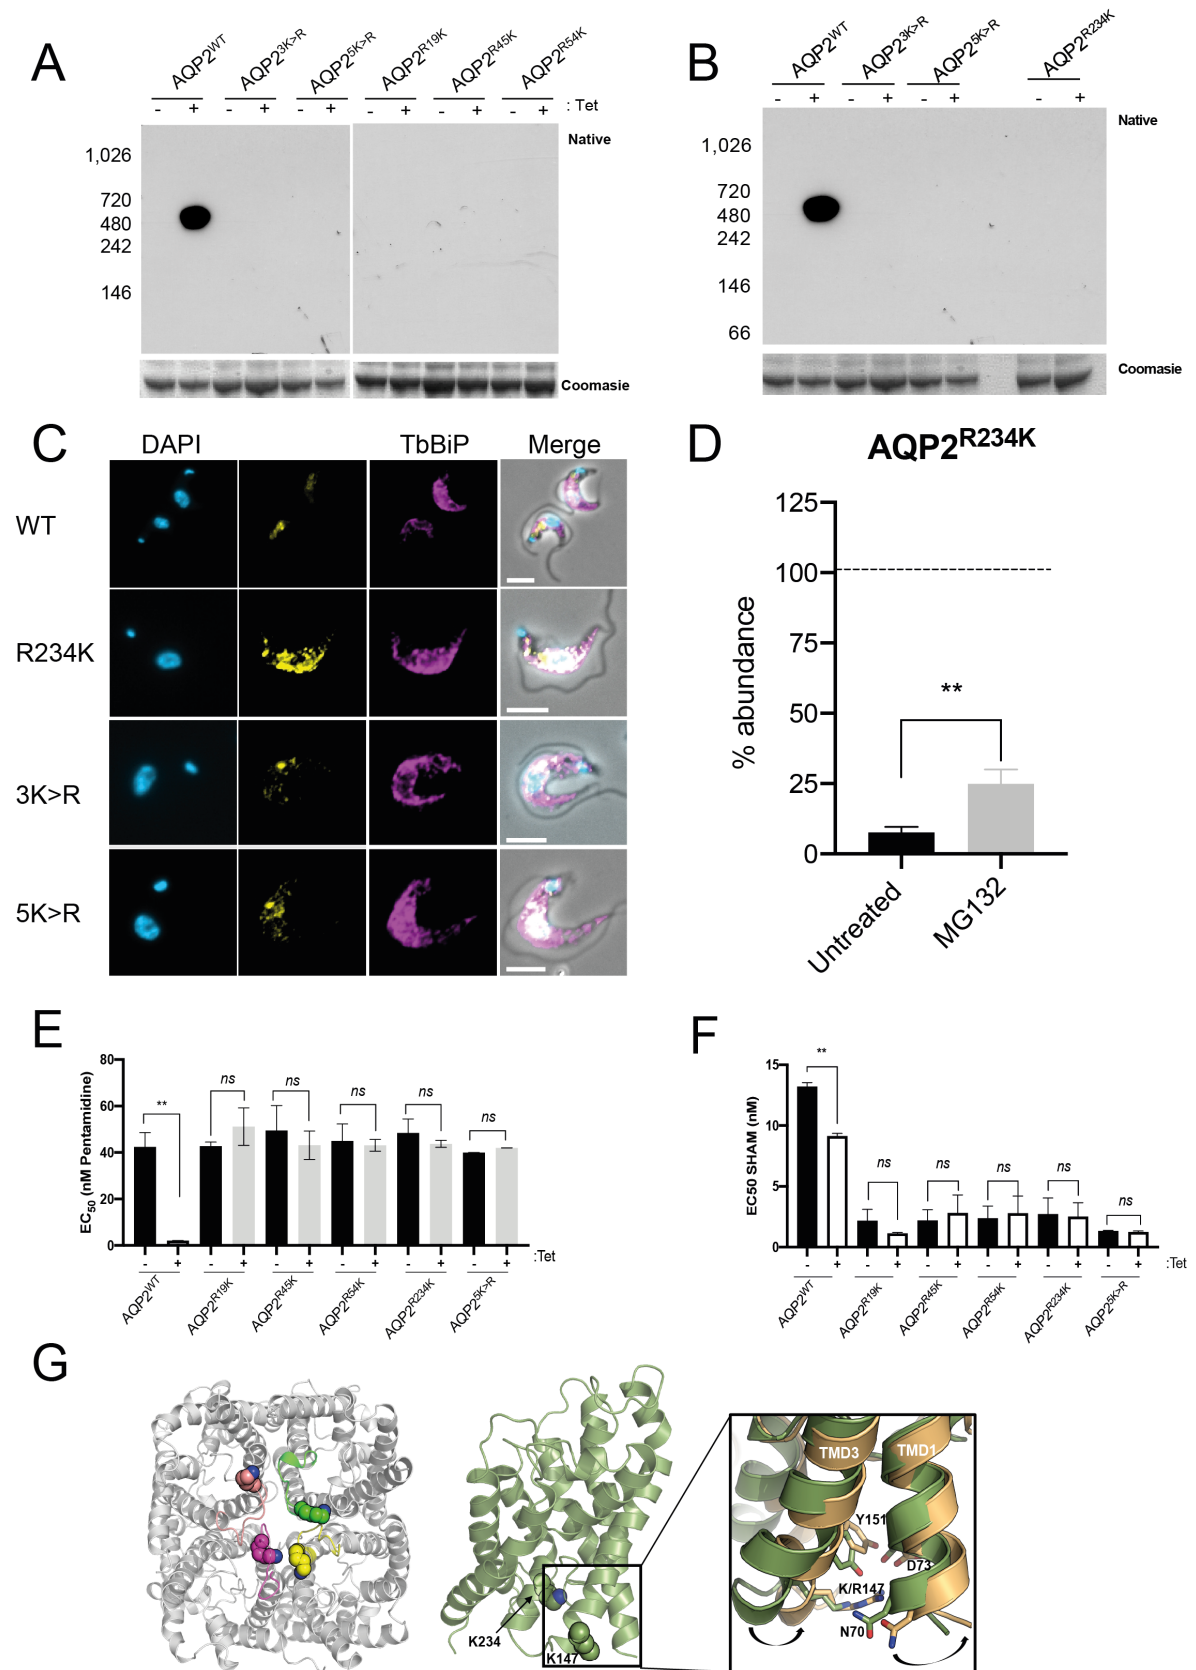

## Figure S5

```
AQP3 MQSQPDNVAYPMELQAVNKDGTVEVRVQGNDDSSN-----RKHEVAEAQEEVPGGIN 60
45BT MQSQPDNVAYPMELQAVNKDGTVEVRVQGNVDNSSNERWDADVQKHEVAEAQEKVPGGIN
130BT MQSQPDNVAYPMELQAVNKDGTVEVRVQGNVDNSSNERWDADVQKHEVAEAQEKVPGGIN
349BT MQSQPDNVAYPMELQAVNKDGTVEVRVQGNVDNSSNERWDADVQKHEVAEAQEKVPGGIN
349AT MQSQPDNVAYPMELQAVNKDGTVEVRVQGNVDNSSNERWDADVQKHEVAEAQEKVPGGIN
40AT MQSQPDNVAYPMELQAVNKDGTVEVRVQGNVDNSSNERWDADVQKHEVAEAQEKVPGGIN
STIB756 MQSQPDNVAYPMELQAVNKDGTVEVRVQGNVDNSSNERWDADVQKHEVAEAQEKVPGGIN
AQP2 MQSQPDNVAYPMELQAVNKDGTVEVRVQGNVDNSSNERWDADVQKHEVAEAQEKVPGGIN
*****:*****:*****:*****:*****:*****:*****:*****:*****:*****:*****
TMD1 TMD2
AQP3 FWAPRELRLNRYRDYMGELLGTFVLLFMGNGVVATVIIDGKLGFLSITLGGI AVTMA LYV 120
45BT FWAPRELRLNRYRDYVAEFLGNFVLIYIYIAKGAVITSLLVPDFGLLGLTIGIGVAVTMA LYV
130BT FWAPRELRLNRYRDYVAEFLGNFVLIYIYIAKGAVITSLLVPDFGLLGLTIGIGVAVTMA LYV
349BT FWAPRELRLNRYRDYVAEFLGNFVLIYIYIAKGAVITSLLVPDFGLLGLTIGIGVAVTMA LYV
349AT FWAPRELRLNRYRDYVAEFLGNFVLIYIYIAKGAVITSLLVPDFGLLGLTIGIGVAVTMA LYV
40AT FWAPRELRLNRYRDYVAEFLGNFVLIYIYIAKGAVITSLLVPDFGLLGLTIGIGVAVTMA LYV
STIB756 FWAPRELRLNRYRDYVAEFLGNFVLIYIYIAKGAVITSLLVPDFGLLGLTIGIGVAVTMA LYV
AQP2 FWAPRELRLNRYRDYVAEFLGNFVLIYIYIAKGAVITSLLVPDFGLLGLTIGIGVAVTMA LYV
*****:*****:*****:*****:*****:*****:*****:*****:*****:*****:*****
TMD3
AQP3 SLGISGGHLNPAVTVGNAVFGDFPWRKVPGYIAAQMLGTFPGAACAYGVFADLLKAHGGG 180
45BT SLGISGGHLNSAVTVGNAVFGDFPWRKVPGYIAAQMLGTFPGAACAYGVFADLLKAHGGG
130BT SLGISGGHLNSAVTVGNAVFGDFPWRKVPGYIAAQMLGTFPGAACAYGVFADLLKAHGGG
349BT SLGISGGHLNSAVTVGNAVFGDFPWRKVPGYIAAQMLGTFPGAACAYGVFADLLKAHGGG
349AT SLGISGGHLNSAVTVGNAVFGDFPWRKVPGYIAAQMLGTFPGAACAYGVFADLLKAHGGG
40AT SLGISGGHLNSAVTVGNAVFGDFPWRKVPGYIAAQMLGTFPGAACAYGVFADLLKAHGGG
STIB756 SLGISGGHLNSAVTVGNAVFGDFPWRKVPGYIAAQMLGTFPGAACAYGVFADLLKAHGGG
AQP2 SLGISGGHLNSAVTVGNAVFGDFPWRKVPGYIAAQMLGTFPGAACAYGVFADLLKAHGGG
*****:*****:*****:*****:*****:*****:*****:*****:*****:*****:*****
TMD4
AQP3 ELIAFGEKGTAGVVFSTYPRDSNGLFSCIFGEFICTAMLLFCVCGIFDPNNSPAKGHEPLA 240
45BT ELIAFGEKGIWVVFAMYPAEENGIFYPIFAELISTAVLLLCVCGIFDPNNSPAKGYETVA
130BT ELIAFGEKGIWVVFAMYPAEENGIFYPIFAELISTAVLLLCVCGIFDPNNSPAKGYETVA
349BT ELIAFGEKGIWVVFAMYPAEENGIFYPIFAELISTAVLLLCVCGIFDPNNSPAKGYETVA
349AT ELIAFGEKGIWVVFAMYPAEENGIFYPIFAELISTAVLLLCVCGIFDPNNSPAKGYETVA
40AT ELIAFGEKGIWVVFAMYPAEENGIFYPIFAELISTAVLLLCVCGIFDPNNSPAKGYETVA
STIB756 ELIAFGEKGIWVVFAMYPAEENGIFYPIFAELISTAVLLLCVCGIFDPNNSPAKGYETVA
AQP2 ELIAFGEKGIWVVFAMYPAEENGIFYPIFAELISTAVLLLCVCGIFDPNNSPAKGYETVA
*****:*****:*****:*****:*****:*****:*****:*****:*****:*****:*****
TMD5 TMD6
AQP3 VGALVFAIGNNIGYSTGYAINPARDFGPRVFSFLYGGKVFSHANYFVWVPLVIPPLFGGI 300
45BT IGALVFVMVNNFGLASPLAMNPSLDFGPRVFSFLYGGGEVFSHANYFVWVPLVIPPLFGGI
130BT IGALVFVMVNNFGLASPLAMNPSLDFGPRVFSFLYGGGEVFSHANYFVWVPLVIPPLFGGI
349BT IGALVFVMVNNFGLASPLAMNPSLDFGPRVFSFLYGGGEVFSHANYFVWVPLVIPPLFGGI
349AT IGALVFVMVNNFGLASPLAMNPSLDFGPRVFSFLYGGGEVFSHANYFVWVPLVIPPLFGGI
40AT IGALVFVMVNNFGLASPLAMNPSLDFGPRVFSFLYGGGEVFSHANYFVWVPLVIPPLFGGI
STIB756 IGALVFVMVNNFGLASPLAMNPSLDFGPRVFGAILLGGEVFSHANYFVWVPLVPPFFGAI
AQP2 IGALVFVMVNNFGLASPLAMNPSLDFGPRVFGAILLGGEVFSHANYFVWVPLVPPFFGAI
*****:*****:*****:*****:*****:*****:*****:*****:*****:*****:*****
AQP3 FGLFLYKYFVPH 312
45BT FGLFLYKYFVPH
130BT FGLFLYKYFVPH
349BT FGLFLYKYFVPH
349AT FGLFLYKYFVPH
40AT FGLFLYKYFVPH
STIB756 LGLFLYKYFLPH
AQP2 LGLFLYKYFLPH
*****:*****:*****:*****:*****:*****:*****:*****:*****:*****:*****
```

**Figure S6**

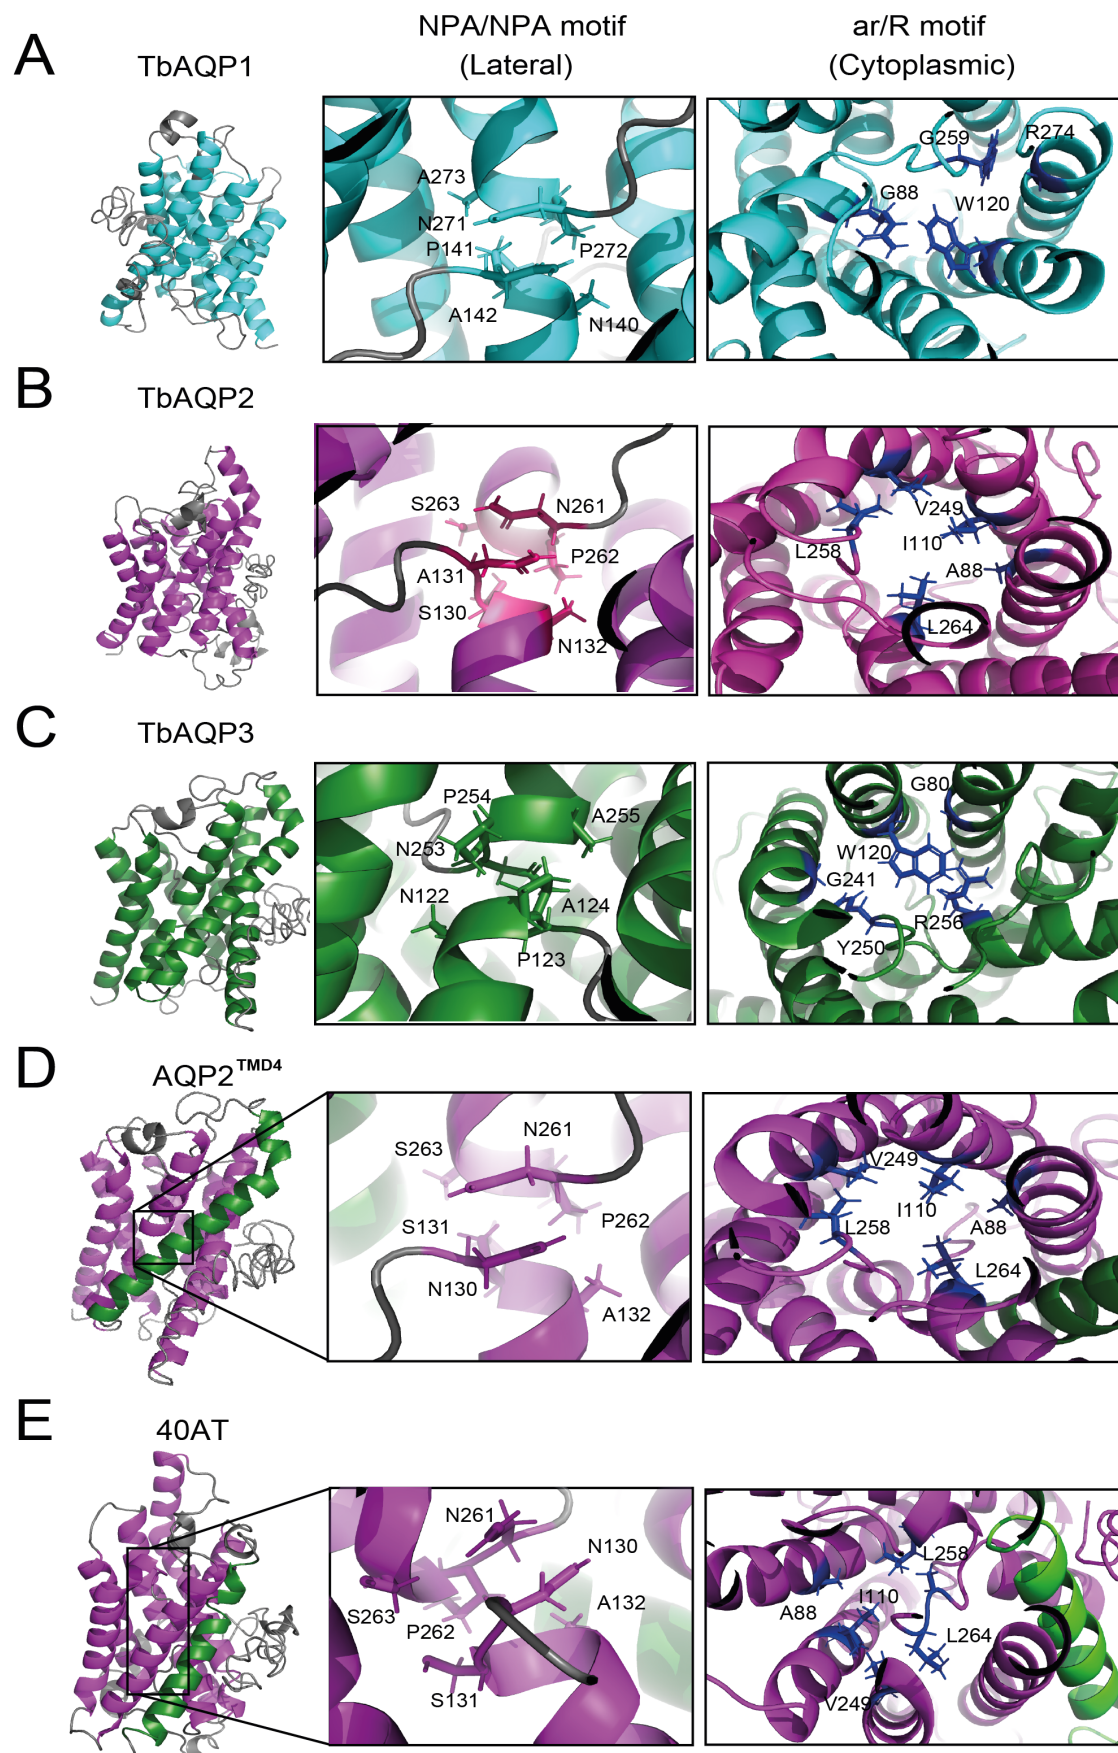

Source: http://biorxiv.org/content/10.1101/2020.02.22.960963v1.full.pdf
